# Supplementary material
Source: PubMed Central journal article supplement (PMC7213861)
Supplement: DB190798SupplementaryData.pdf [file DB190798SupplementaryData.pdf]

SUPPLEMENTARY DATA

**Supplementary Figure 1.** Participants flow chart included in current study

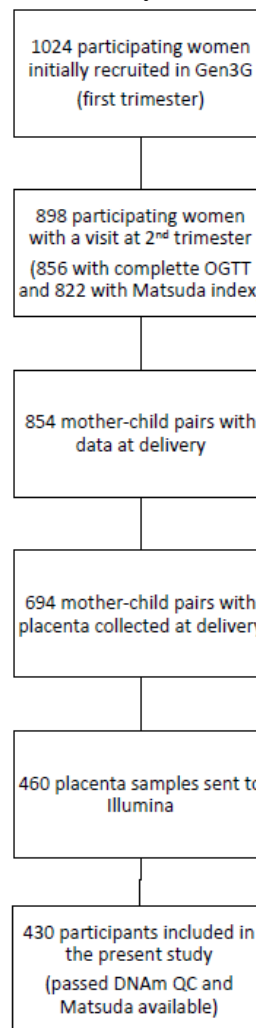

Supplementary Figure 2.

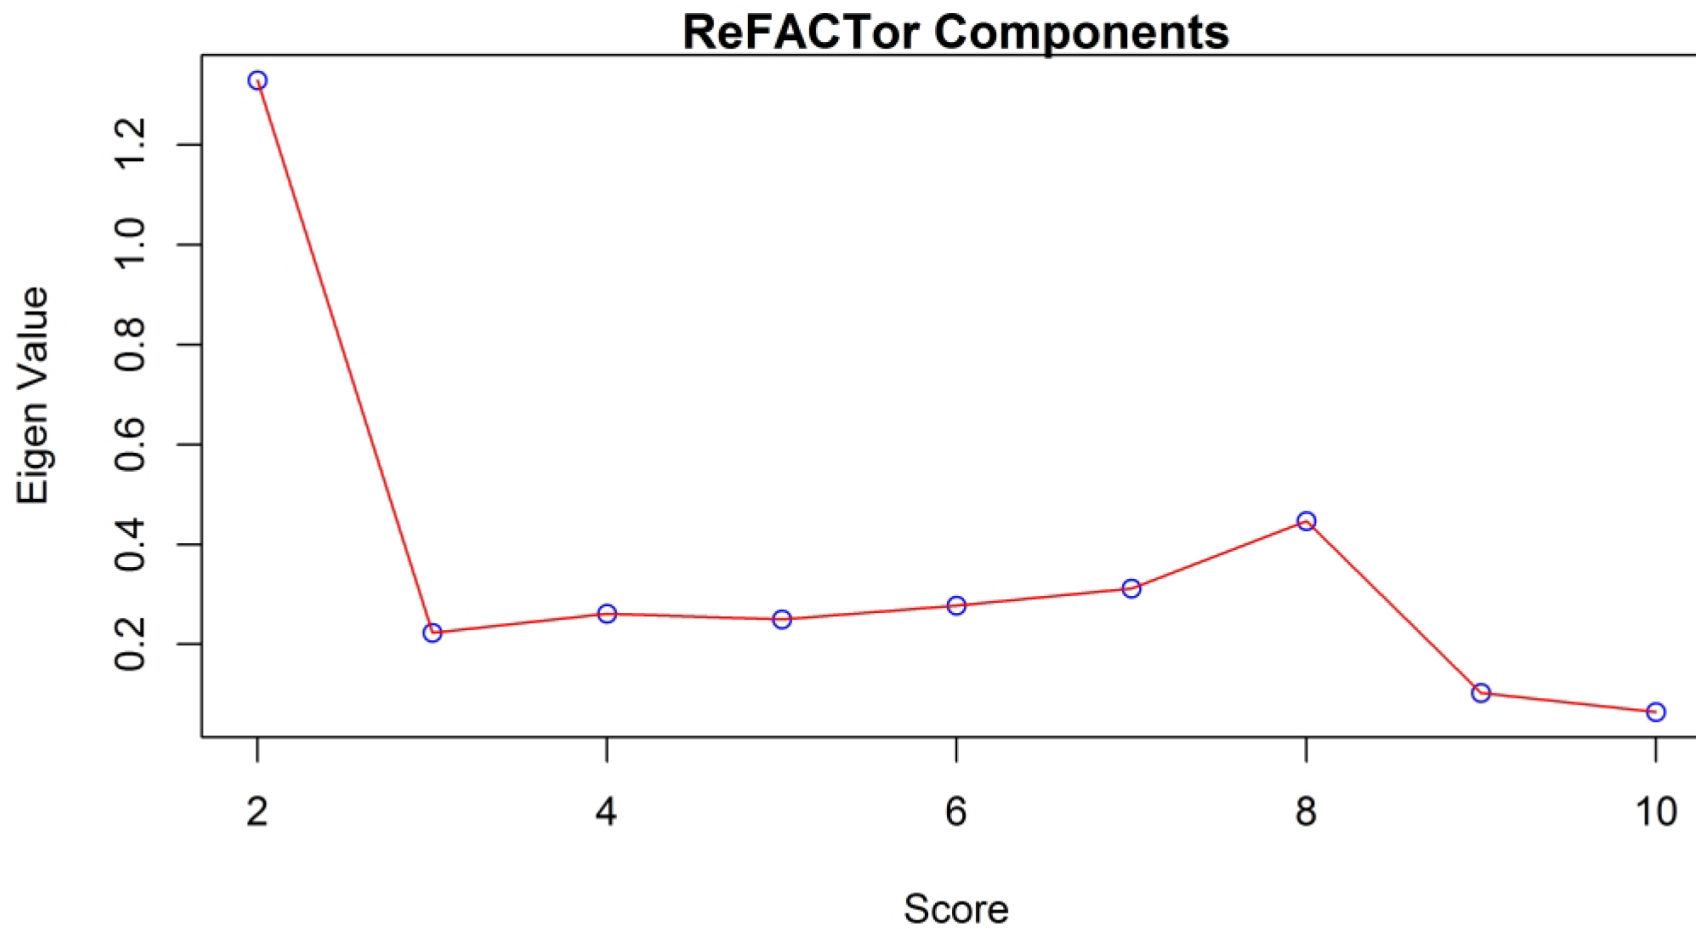

SUPPLEMENTARY DATA

Supplementary Figure 3.

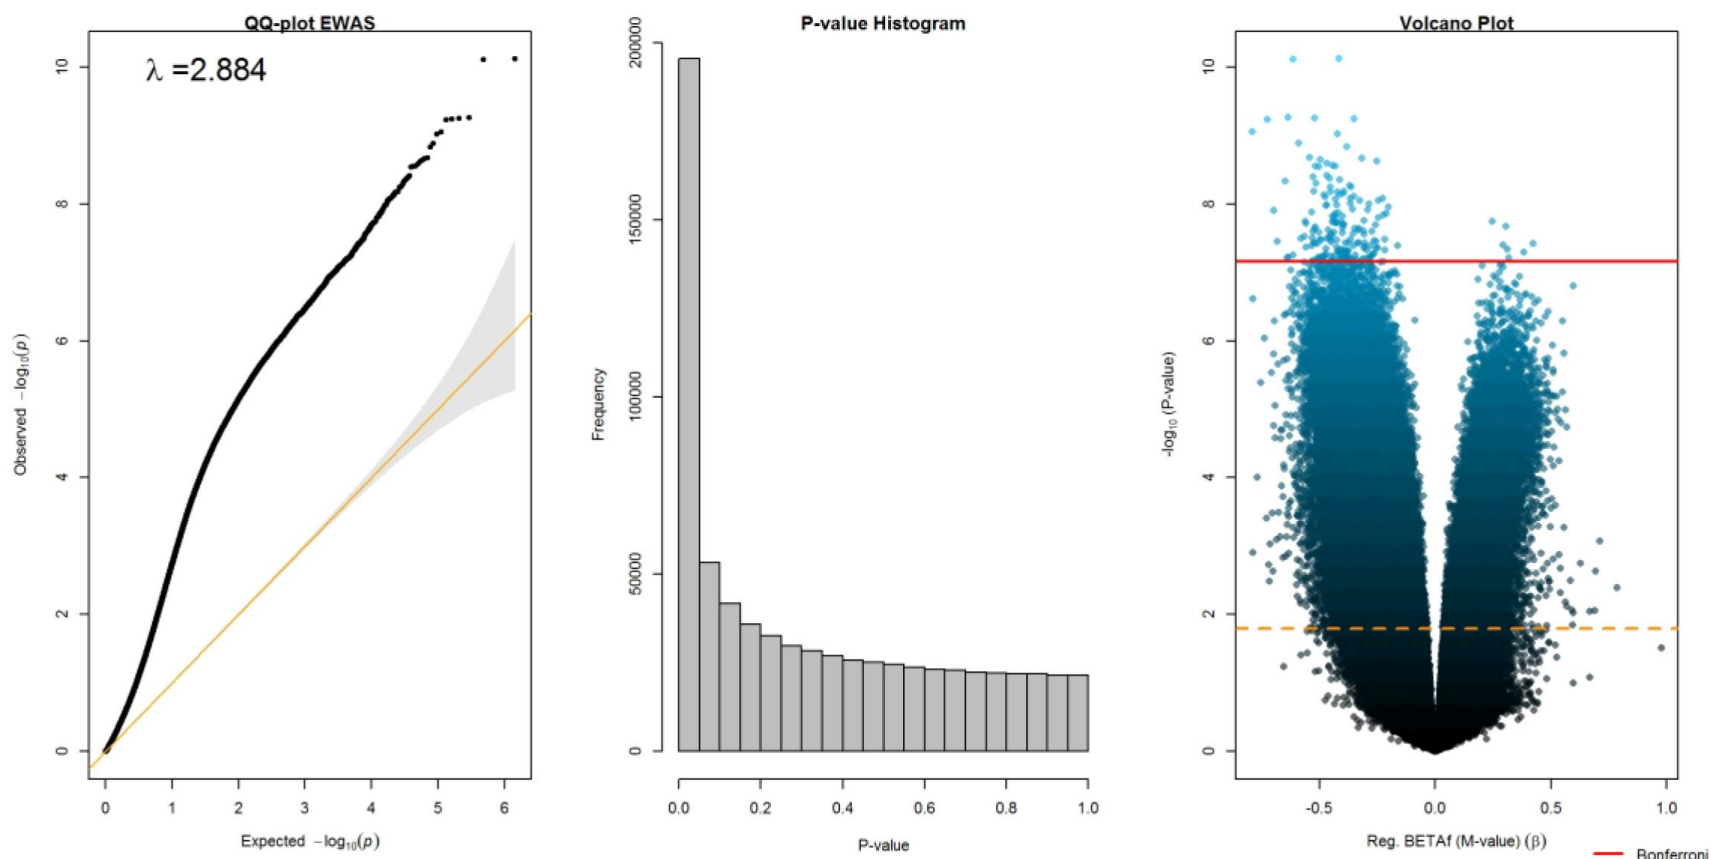

SUPPLEMENTARY DATA

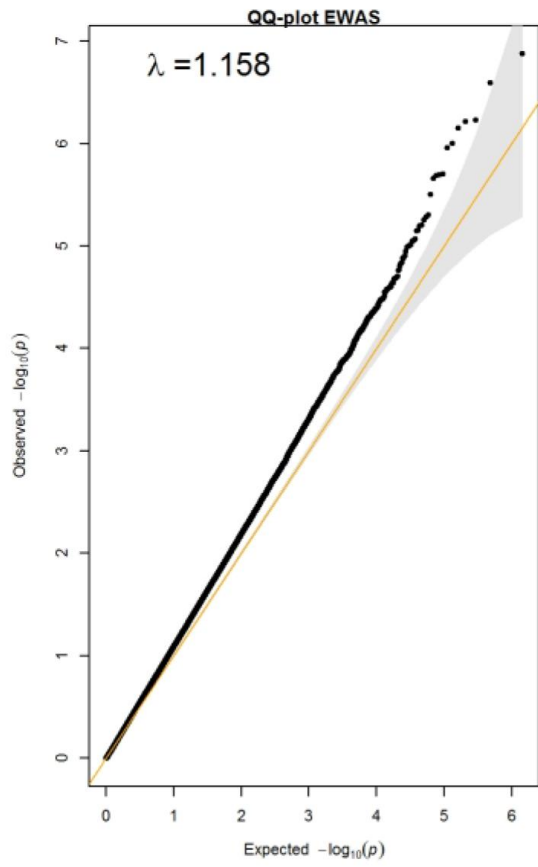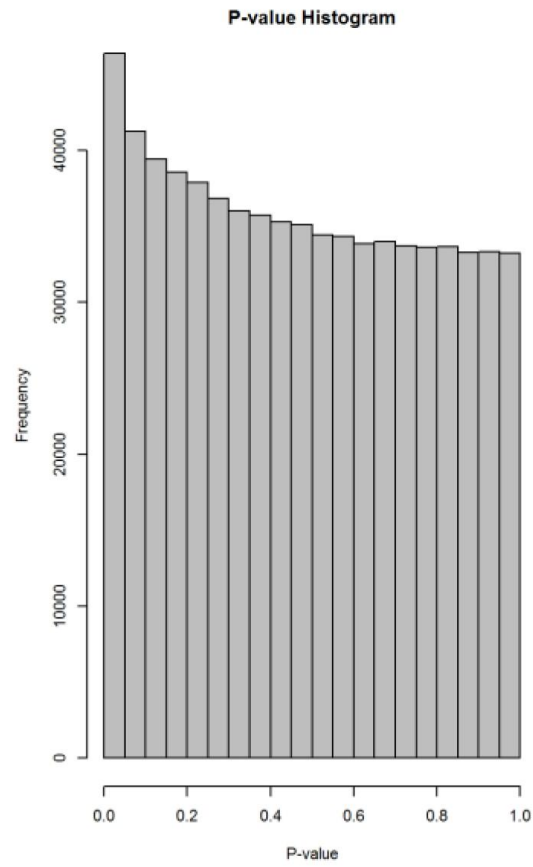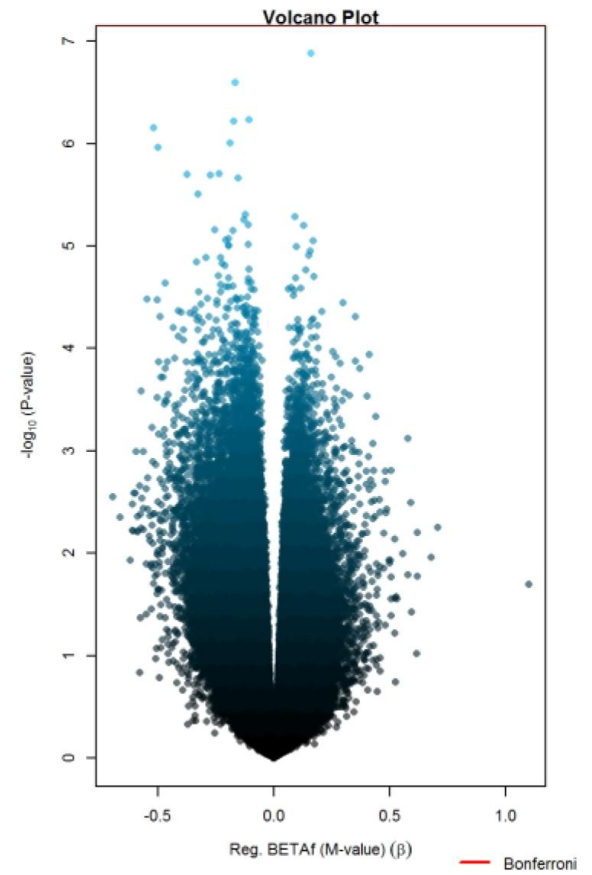

SUPPLEMENTARY DATA

| Supplementary Table 1: Single Nucleotide Polymorphisms (SNPs) used to create genetic risk score (GRS) of insulin sensitivity |              |                       |                                           |                                        |
|------------------------------------------------------------------------------------------------------------------------------|--------------|-----------------------|-------------------------------------------|----------------------------------------|
| SNPs                                                                                                                         | chr position | annotated gene        | initial association in Prokenpenko et al. | Association in Gen3G with Matsuda (ln) |
|                                                                                                                              |              |                       | Beta                                      | beta (SE)                              |
| rs1260326                                                                                                                    | 2:27730940   | <i>GCKR</i>           | -0.067                                    | -0.02307 (0.03824)                     |
| rs35767                                                                                                                      | 12:102875569 | <i>IGF1</i>           | -0.080                                    | 0.01581 (0.05446)                      |
| rs459193                                                                                                                     | 5:55806751   | <i>ANKRD55/MAP3K1</i> | -0.053                                    | -0.09932 (0.04122)                     |
| rs4846565                                                                                                                    | 1:219722104  | <i>LYPLAL1</i>        | -0.044                                    | -0.09431 (0.04130)                     |
| rs4865796                                                                                                                    | 5:53272664   | <i>ARL15</i>          | -0.071                                    | -0.01121 (0.04271)                     |
| rs6822892                                                                                                                    | 4:157734675  | <i>PDGFC</i>          | -0.093                                    | -0.006239 (0.040982)                   |
| rs7607980                                                                                                                    | 2:165551201  | <i>COBLL1</i>         | -0.120                                    | -0.09199 (0.05452)                     |
| rs1801282                                                                                                                    | 3:12393125   | <i>PPARG</i>          | -0.084                                    | -0.10657 (0.06494)                     |









SUPPLEMENTARY DATA

**Supplementary Table 3. ReFACTor PCs and associations with Mastuda index and co-variables**

|                          | Pval_PC1 | Pval_PC2 | Pval_PC3 | Pval_PC4 | Pval_PC5 | Pval_PC6 | Pval_PC7 | Pval_PC8 | Pval_PC9 | Pval_PC10 |
|--------------------------|----------|----------|----------|----------|----------|----------|----------|----------|----------|-----------|
| Matsuda index            | <0.0001  | 0.011    | 0.495    | 0.123    | 0.021    | 0.068    | 0.603    | 0.822    | 0.505    | 0.932     |
| Maternal age             | 0.202    | 0.080    | 0.715    | 0.642    | 0.726    | 0.034    | 0.225    | 0.614    | 0.432    | 0.163     |
| Maternal BMI (V1)        | 0.314    | 0.700    | 0.407    | 0.570    | 0.756    | 0.433    | 0.801    | 0.367    | 0.971    | 0.193     |
| Gravid status            | 0.635    | 0.338    | 0.289    | 0.351    | 0.598    | 0.212    | 0.146    | 0.350    | 0.299    | 0.307     |
| Maternal Smoking         | 0.539    | 0.828    | 0.007    | 0.342    | 0.459    | 0.664    | 0.227    | 0.148    | 0.109    | 0.257     |
| Gestational age at birth | 0.289    | 0.736    | <0.0001  | 0.344    | 0.090    | 0.585    | 0.003    | 0.180    | 0.744    | 0.694     |
| Child sex                | 0.834    | 0.578    | 0.469    | 0.073    | 0.398    | 0.140    | 0.580    | 0.883    | 0.441    | 0.007     |

P-values from correlations if continuous variables, and from Kruskal-Wallis if categorical variables

SUPPLEMENTARY DATA

**Supplementary Table 4. Results from Mendelian Randomization analyses, building genetic instrumental variables (GRS or single SNP) for DNA methylation at 188 CpGs identified in Model 1 using cis-- - SNPs within 500kb around each CpG site**

SUPPLEMENTARY DATA

|            |     |           | GRS information on association with CpG and elastic net statistics (N = 418) |           |            |          |       |                         |                    |                          |                  |          |       | linear regression ln(matsuda) ~ GRS (N = 401) |         |                                  |          | TSLS results (N = 401) |         |                                  | linear regression ln(matsuda) ~ CpG (N = 401) |       |          |
|------------|-----|-----------|------------------------------------------------------------------------------|-----------|------------|----------|-------|-------------------------|--------------------|--------------------------|------------------|----------|-------|-----------------------------------------------|---------|----------------------------------|----------|------------------------|---------|----------------------------------|-----------------------------------------------|-------|----------|
| CPG        | chr | pos       | Estimate                                                                     | Std.Error | P.Value    | r.square | Fstat | N of SNPs within ±500kb | N of SNPs MAF<0.05 | N SNPs without duplicate | N of SNPs in GRS | estimate | SE    | P_value                                       | Rsquare | P_value adj for multiple testing | estimate | SE                     | P_value | P_value adj for multiple testing | estimate                                      | SE    | P_value  |
| cg12658750 | 18  | 75499382  | 0.169                                                                        | 0.028     | 3.37E-09   | 0.081    | 36.5  | 16935                   | 3291               | 1811                     | 5                | -0.079   | 0.023 | 0.0008                                        | 0.028   | 0.03                             | -0.448   | 0.142                  | 0.0017  | 0.046                            | -0.150                                        | 0.039 | 1.45E-04 |
| cg24475484 | 8   | 1625395   | 0.189                                                                        | 0.025     | 2.81E-13   | 0.120    | 57.0  | 25101                   | 4134               | 2769                     | 10               | -0.046   | 0.014 | 0.0009                                        | 0.027   | 0.03                             | -0.242   | 0.074                  | 0.0012  | 0.046                            | -0.103                                        | 0.025 | 5.09E-05 |
| cg01618245 | 20  | 61990279  | 0.113                                                                        | 0.012     | 3.20E-20   | 0.185    | 94.3  | 18168                   | 2970               | 1608                     | 34               | -0.022   | 0.007 | 0.0010                                        | 0.027   | 0.03                             | -0.195   | 0.059                  | 0.0011  | 0.046                            | -0.106                                        | 0.025 | 3.31E-05 |
| cg08099672 | 9   | 139944162 | 0.095                                                                        | 0.013     | 2.76E-12   | 0.111    | 51.9  | 17133                   | 1692               | 1077                     | 13               | -0.034   | 0.010 | 0.0012                                        | 0.026   | 0.03                             | -0.342   | 0.107                  | 0.0015  | 0.046                            | -0.156                                        | 0.036 | 1.97E-05 |
| cg12673377 | 7   | 1388271   | 0.062                                                                        | 0.005     | 2.37E-27   | 0.246    | 135.8 | 20418                   | 2694               | 1672                     | 51               | -0.015   | 0.004 | 0.0012                                        | 0.026   | 0.03                             | -0.238   | 0.073                  | 0.0012  | 0.046                            | -0.150                                        | 0.036 | 3.07E-05 |
| cg03699074 | 16  | 88849875  | 0.095                                                                        | 0.014     | 2.21E-11   | 0.102    | 47.3  | 21611                   | 2782               | 1905                     | 17               | 0.022    | 0.007 | 0.0030                                        | 0.022   | 0.07                             | 0.224    | 0.078                  | 0.0044  | 0.10                             | 0.075                                         | 0.025 | 3.13E-03 |
| cg24073146 | 11  | 2543204   | 0.108                                                                        | 0.017     | 1.35E-09   | 0.085    | 38.5  | 17447                   | 2473               | 1698                     | 6                | -0.046   | 0.016 | 0.0039                                        | 0.021   | 0.07                             | -0.416   | 0.150                  | 0.006   | 0.11                             | -0.140                                        | 0.042 | 8.89E-04 |
| cg08511578 | 10  | 1403938   | 0.106                                                                        | 0.024     | 1.50E-05   | 0.044    | 19.2  | 17754                   | 2647               | 1657                     | 4                | -0.034   | 0.013 | 0.0079                                        | 0.018   | 0.13                             | -0.327   | 0.134                  | 0.015   | 0.16                             | -0.098                                        | 0.025 | 8.29E-05 |
| cg11765907 | 20  | 43103949  | 0.047                                                                        | 0.005     | 1.50E-16   | 0.151    | 74.2  | 14001                   | 1783               | 1041                     | 27               | -0.016   | 0.006 | 0.010                                         | 0.016   | 0.15                             | -0.324   | 0.125                  | 0.010   | 0.16                             | -0.187                                        | 0.050 | 1.95E-04 |
| cg02384870 | 2   | 216161208 | 0.175                                                                        | 0.033     | 1.53E-07   | 0.064    | 28.5  | 14134                   | 1835               | 1063                     | 5                | -0.042   | 0.017 | 0.014                                         | 0.015   | 0.17                             | -0.243   | 0.100                  | 0.016   | 0.16                             | -0.112                                        | 0.024 | 4.84E-06 |
| cg21396983 | 16  | 1275423   | 0.079                                                                        | 0.009     | 1.39E-16   | 0.152    | 74.3  | 21550                   | 2710               | 1738                     | 24               | -0.015   | 0.006 | 0.016                                         | 0.015   | 0.17                             | -0.182   | 0.074                  | 0.014   | 0.16                             | -0.144                                        | 0.030 | 1.97E-06 |
| cg09640571 | 16  | 88388040  | 0.031                                                                        | 0.004     | 1.75E-12   | 0.113    | 52.9  | 21289                   | 3220               | 2169                     | 27               | -0.011   | 0.005 | 0.016                                         | 0.014   | 0.17                             | -0.356   | 0.147                  | 0.016   | 0.16                             | -0.211                                        | 0.049 | 1.71E-05 |
| cg24857040 | 13  | 113565214 | 0.079                                                                        | 0.008     | 5.26E-21   | 0.192    | 98.7  | 17276                   | 2194               | 1324                     | 26               | -0.013   | 0.006 | 0.018                                         | 0.014   | 0.17                             | -0.169   | 0.071                  | 0.017   | 0.16                             | -0.126                                        | 0.032 | 7.73E-05 |
| cg20612875 | 17  | 1094308   | 0.035                                                                        | 0.003     | 4.26E-22   | 0.201    | 104.9 | 18826                   | 2792               | 1917                     | 39               | -0.009   | 0.004 | 0.020                                         | 0.014   | 0.17                             | -0.252   | 0.106                  | 0.017   | 0.16                             | -0.224                                        | 0.049 | 7.78E-06 |
| cg23521973 | 10  | 125117429 | 0.079                                                                        | 0.011     | 7.45E-13   | 0.116    | 54.8  | 15015                   | 2399               | 1336                     | 17               | -0.017   | 0.007 | 0.020                                         | 0.014   | 0.17                             | -0.212   | 0.090                  | 0.019   | 0.16                             | -0.138                                        | 0.031 | 1.13E-05 |
| cg14440140 | 9   | 140177567 | 0.081                                                                        | 0.008     | 8.24E-21   | 0.190    | 97.6  | 16195                   | 1470               | 921                      | 34               | -0.013   | 0.006 | 0.025                                         | 0.012   | 0.19                             | -0.154   | 0.068                  | 0.024   | 0.19                             | -0.109                                        | 0.030 | 3.10E-04 |
| cg06429120 | 16  | 86309214  | 0.155                                                                        | 0.013     | 9.85E-28   | 0.249    | 138.1 | 22860                   | 3698               | 2812                     | 36               | -0.015   | 0.007 | 0.027                                         | 0.012   | 0.19                             | -0.097   | 0.043                  | 0.023   | 0.19                             | -0.101                                        | 0.021 | 1.86E-06 |
| cg00460471 | 2   | 61437605  | 0.102                                                                        | 0.024     | 3.10E-05   | 0.041    | 17.7  | 13349                   | 1511               | 814                      | 3                | -0.032   | 0.014 | 0.028                                         | 0.012   | 0.19                             | -0.319   | 0.151                  | 0.035   | 0.21                             | -0.118                                        | 0.028 | 3.55E-05 |
| cg02110836 | 17  | 71953083  | 0.057                                                                        | 0.005     | 2.91E-24   | 0.220    | 117.4 | 17019                   | 2437               | 1629                     | 30               | -0.015   | 0.007 | 0.028                                         | 0.012   | 0.19                             | -0.265   | 0.119                  | 0.026   | 0.19                             | -0.227                                        | 0.056 | 5.57E-05 |
| cg06077821 | 5   | 180048893 | 0.047                                                                        | 0.005     | 2.68E-19   | 0.176    | 89.1  | 16657                   | 2554               | 1497                     | 34               | -0.008   | 0.004 | 0.031                                         | 0.012   | 0.20                             | -0.178   | 0.081                  | 0.028   | 0.19                             | -0.146                                        | 0.034 | 2.43E-05 |
| cg00875983 | 11  | 3240213   | 0.071                                                                        | 0.008     | 1.34E-18   | 0.170    | 85.3  | 17171                   | 2667               | 1744                     | 20               | -0.017   | 0.008 | 0.033                                         | 0.011   | 0.21                             | -0.237   | 0.109                  | 0.031   | 0.20                             | -0.176                                        | 0.045 | 1.16E-04 |
| cg14361947 | 9   | 140780551 | 0.056                                                                        | 0.007     | 5.95E-15   | 0.136    | 65.7  | 12059                   | 978                | 679                      | 24               | -0.016   | 0.008 | 0.041                                         | 0.010   | 0.22                             | -0.295   | 0.144                  | 0.041   | 0.21                             | -0.161                                        | 0.052 | 2.02E-03 |
| cg00386725 | 1   | 18617791  | 0.095                                                                        | 0.012     | 6.12E-15   | 0.136    | 65.6  | 16267                   | 2471               | 1494                     | 12               | -0.024   | 0.012 | 0.041                                         | 0.010   | 0.22                             | -0.248   | 0.120                  | 0.038   | 0.21                             | -0.185                                        | 0.044 | 3.53E-05 |
| cg10964639 | 16  | 24043296  | 0.059                                                                        | 0.008     | 4.62E-13   | 0.118    | 55.9  | 14736                   | 2182               | 1222                     | 24               | -0.011   | 0.005 | 0.041                                         | 0.010   | 0.22                             | -0.182   | 0.088                  | 0.039   | 0.21                             | -0.122                                        | 0.031 | 9.72E-05 |
| cg11855710 | 19  | 29768180  | 0.148                                                                        | 0.021     | 1.85E-11   | 0.103    | 47.7  | 17654                   | 3015               | 1361                     | 10               | -0.029   | 0.014 | 0.043                                         | 0.010   | 0.22                             | -0.199   | 0.096                  | 0.039   | 0.21                             | -0.150                                        | 0.031 | 2.42E-06 |
| cg12954267 | 6   | 33093109  | 0.092                                                                        | 0.026     | 4.69E-04   | 0.029    | 12.4  | 18517                   | 6412               | 2328                     | 3                | -0.028   | 0.014 | 0.045                                         | 0.010   | 0.22                             | -0.321   | 0.174                  | 0.07    | 0.27                             | -0.089                                        | 0.025 | 5.30E-04 |
| cg00389386 | 1   | 6188136   | 0.062                                                                        | 0.007     | 8.31E-17   | 0.154    | 75.5  | 16477                   | 1981               | 1136                     | 22               | -0.014   | 0.007 | 0.045                                         | 0.010   | 0.22                             | -0.234   | 0.115                  | 0.043   | 0.21                             | -0.174                                        | 0.044 | 1.06E-04 |
| cg21347874 | 17  | 77122733  | 0.083                                                                        | 0.012     | 6.99E-11   | 0.097    | 44.8  | 16022                   | 2400               | 1721                     | 13               | -0.016   | 0.008 | 0.047                                         | 0.010   | 0.22                             | -0.188   | 0.093                  | 0.044   | 0.21                             | -0.127                                        | 0.029 | 1.26E-05 |
| cg27625886 | 20  | 62060443  | 0.135                                                                        | 0.015     | 8.29E-17   | 0.154    | 75.6  | 18081                   | 2937               | 1609                     | 17               | -0.018   | 0.009 | 0.05                                          | 0.009   | 0.23                             | -0.128   | 0.064                  | 0.048   | 0.23                             | -0.108                                        | 0.026 | 3.90E-05 |
| cg11586089 | 14  | 66644923  | 0.090                                                                        | 0.010     | 2.11E-17   | 0.159    | 78.8  | 13997                   | 1665               | 708                      | 35               | -0.013   | 0.007 | 0.06                                          | 0.009   | 0.25                             | -0.147   | 0.077                  | 0.06    | 0.25                             | -0.110                                        | 0.030 | 2.96E-04 |
| cg16340422 | 17  | 17110120  | 0.137                                                                        | 0.020     | 6.55E-11   | 0.098    | 45.0  | 13630                   | 1744               | 1022                     | 10               | -0.025   | 0.013 | 0.06                                          | 0.009   | 0.26                             | -0.187   | 0.098                  | 0.06    | 0.25                             | -0.124                                        | 0.029 | 2.89E-05 |
| cg18861231 | 3   | 152057943 | 0.035                                                                        | 0.007     | 3.48E-07   | 0.061    | 26.8  | 13018                   | 1777               | 676                      | 18               | -0.007   | 0.004 | 0.06                                          | 0.009   | 0.26                             | -0.195   | 0.106                  | 0.07    | 0.27                             | -0.079                                        | 0.025 | 1.53E-03 |
| cg03568769 | 11  | 1800837   | 0.074                                                                        | 0.005     | 1.28E-36   | 0.319    | 195.0 | 17582                   | 2953               | 1759                     | 66               | -0.008   | 0.004 | 0.07                                          | 0.008   | 0.27                             | -0.104   | 0.057                  | 0.07    | 0.27                             | -0.117                                        | 0.032 | 3.12E-04 |
| cg12760575 | 9   | 139158654 | 0.110                                                                        | 0.013     | 5.14E-16   | 0.146    | 71.3  | 17109                   | 1972               | 1300                     | 15               | -0.020   | 0.011 | 0.07                                          | 0.008   | 0.28                             | -0.185   | 0.102                  | 0.07    | 0.27                             | -0.151                                        | 0.039 | 1.47E-04 |
| cg26037026 | 7   | 1641922   | 0.194                                                                        | 0.055     | 0.000489   | 0.029    | 12.4  | 20490                   | 2519               | 1493                     | 1                | -0.078   | 0.045 | 0.08                                          | 0.008   | 0.30                             | -0.406   | 0.241                  | 0.09    | 0.30                             | -0.143                                        | 0.039 | 2.39E-04 |
| cg14839558 | 1   | 1874488   | 0.141                                                                        | 0.017     | 3.66E-15   | 0.138    | 66.8  | 17112                   | 1789               | 1113                     | 19               | -0.018   | 0.010 | 0.08                                          | 0.008   | 0.30                             | -0.133   | 0.075                  | 0.08    | 0.29                             | -0.104                                        | 0.027 | 1.38E-04 |
| cg24600306 | 20  | 61990671  | 0.070                                                                        | 0.007     | 5.23E-19   | 0.174    | 87.5  | 18172                   | 2970               | 1608                     | 24               | -0.013   | 0.008 | 0.08                                          | 0.007   | 0.30                             | -0.193   | 0.110                  | 0.08    | 0.29                             | -0.174                                        | 0.046 | 1.91E-04 |
| cg16853336 | 3   | 149396490 | 0.040                                                                        | 0.006     | 6.82E-11   | 0.097    | 44.9  | 13981                   | 2115               | 1079                     | 19               | -0.011   | 0.006 | 0.09                                          | 0.007   | 0.30                             | -0.270   | 0.157                  | 0.09    | 0.30                             | -0.174                                        | 0.050 | 5.04E-04 |
| cg08149223 | 10  | 50507130  | 0.043                                                                        | 0.007     | 1.56E-09   | 0.084    | 38.1  | 15782                   | 2177               | 1029                     | 16               | -0.012   | 0.007 | 0.09                                          | 0.007   | 0.30                             | -0.273   | 0.159                  | 0.09    | 0.30                             | -0.171                                        | 0.047 | 2.86E-04 |
| cg00781180 | 16  | 73984002  | 0.218                                                                        | 0.037     | 4.82E-09   | 0.079    | 35.8  | 15775                   | 1655               | 1261                     | 6                | -0.038   | 0.023 | 0.09                                          | 0.007   | 0.30                             | -0.177   | 0.103                  | 0.09    | 0.30                             | -0.111                                        | 0.028 | 1.11E-04 |
| cg16444062 | 16  | 2770298   | 0.236                                                                        | 0.053     | 1.03E-05   | 0.046    | 19.9  | 15567                   | 1480               | 949                      | 3                | -0.047   | 0.029 | 0.10                                          | 0.007   | 0.32                             | -0.192   | 0.117                  | 0.10    | 0.31                             | -0.105                                        | 0.026 | 4.92E-05 |
| cg24738497 | 19  | 36005395  | 0.130                                                                        | 0.024     | 5.27E-08   | 0.069    | 30.7  | 14689                   | 2074               | 1243                     | 4                | -0.028   | 0.017 | 0.10                                          | 0.007   | 0.32                             | -0.206   | 0.124                  | 0.10    | 0.31                             | -0.149                                        | 0.034 | 1.20E-05 |
| cg17756860 | 4   | 110510374 | 0.122                                                                        | 0.034     | 0.00034286 | 0.030    | 13.0  | 13975                   | 1499               | 674                      | 4                | -0.032   | 0.020 | 0.11                                          | 0.007   | 0.32                             | -0.264   | 0.163                  | 0.11    | 0.31                             | -0.128                                        | 0.028 | 6.14E-06 |
| cg08737919 | 12  | 108840669 | 0.207                                                                        | 0.034     | 2.47E-09   | 0.082    | 37.2  | 14629                   | 2021               | 914                      | 6                | -0.034   | 0.021 | 0.11                                          | 0.006   | 0.32                             | -0.163   | 0.101                  | 0.11    | 0.31                             | -0.095                                        | 0.030 | 1.37E-03 |

SUPPLEMENTARY DATA

|            |    |           |       |       |            |       |       |       |      |      |    |        |       |      |       |      |        |       |      |      |        |       |          |
|------------|----|-----------|-------|-------|------------|-------|-------|-------|------|------|----|--------|-------|------|-------|------|--------|-------|------|------|--------|-------|----------|
| cg12193237 | 19 | 3907913   | 0.048 | 0.005 | 8.51E-18   | 0.163 | 80.9  | 16921 | 2133 | 1364 | 36 | -0.007 | 0.004 | 0.11 | 0.006 | 0.32 | -0.147 | 0.090 | 0.10 | 0.31 | -0.143 | 0.036 | 8.65E-05 |
| cg07435932 | 13 | 19648633  | 0.381 | 0.127 | 0.00280574 | 0.021 | 9.0   | 16939 | 2652 | 1044 | 1  | -0.102 | 0.065 | 0.12 | 0.006 | 0.34 | -0.283 | 0.192 | 0.14 | 0.36 | -0.091 | 0.025 | 2.94E-04 |
| cg13449257 | 9  | 137355128 | 0.055 | 0.009 | 1.52E-08   | 0.074 | 33.3  | 18196 | 2544 | 1691 | 14 | -0.011 | 0.007 | 0.13 | 0.006 | 0.36 | -0.191 | 0.125 | 0.13 | 0.36 | -0.145 | 0.034 | 2.35E-05 |
| cg02287371 | 5  | 1246274   | 0.157 | 0.037 | 2.90E-05   | 0.041 | 17.9  | 17997 | 2289 | 1564 | 3  | -0.033 | 0.022 | 0.13 | 0.006 | 0.36 | -0.208 | 0.139 | 0.14 | 0.36 | -0.097 | 0.028 | 4.76E-04 |
| cg06751809 | 3  | 105047227 | 0.106 | 0.019 | 2.81E-08   | 0.072 | 32.0  | 14927 | 2475 | 943  | 13 | -0.012 | 0.008 | 0.13 | 0.006 | 0.36 | -0.115 | 0.075 | 0.13 | 0.36 | -0.086 | 0.020 | 3.58E-05 |
| cg01948226 | 6  | 32829208  | 0.092 | 0.015 | 1.24E-09   | 0.085 | 38.6  | 19534 | 8426 | 2926 | 10 | -0.014 | 0.010 | 0.14 | 0.005 | 0.37 | -0.159 | 0.106 | 0.13 | 0.36 | -0.127 | 0.030 | 2.87E-05 |
| cg00046877 | 22 | 19702664  | 0.065 | 0.009 | 2.83E-12   | 0.111 | 51.8  | 15502 | 2141 | 1221 | 12 | -0.016 | 0.011 | 0.15 | 0.005 | 0.38 | -0.248 | 0.168 | 0.14 | 0.36 | -0.209 | 0.057 | 2.84E-04 |
| cg01864178 | 20 | 44662890  | 0.087 | 0.014 | 1.25E-09   | 0.085 | 38.6  | 14114 | 1927 | 859  | 15 | -0.012 | 0.009 | 0.16 | 0.005 | 0.38 | -0.148 | 0.102 | 0.15 | 0.37 | -0.129 | 0.029 | 1.16E-05 |
| cg18682781 | 5  | 176277687 | 0.190 | 0.042 | 8.45E-06   | 0.047 | 20.3  | 14377 | 1242 | 712  | 3  | -0.035 | 0.025 | 0.16 | 0.005 | 0.38 | -0.181 | 0.127 | 0.16 | 0.37 | -0.117 | 0.028 | 3.03E-05 |
| cg13463516 | 9  | 138632121 | 0.035 | 0.005 | 5.61E-11   | 0.098 | 45.3  | 18674 | 2377 | 1670 | 24 | -0.006 | 0.004 | 0.17 | 0.005 | 0.38 | -0.163 | 0.115 | 0.16 | 0.37 | -0.147 | 0.036 | 5.41E-05 |
| cg09319487 | 20 | 56771178  | 0.148 | 0.012 | 4.59E-28   | 0.252 | 140.1 | 15943 | 2235 | 1345 | 28 | -0.012 | 0.009 | 0.17 | 0.005 | 0.38 | -0.083 | 0.060 | 0.16 | 0.37 | -0.101 | 0.030 | 9.53E-04 |
| cg08204714 | 16 | 87726461  | 0.201 | 0.064 | 0.00182003 | 0.023 | 9.8   | 21918 | 2969 | 2053 | 1  | -0.093 | 0.067 | 0.17 | 0.005 | 0.38 | -0.475 | 0.355 | 0.18 | 0.37 | -0.180 | 0.049 | 2.58E-04 |
| cg24064348 | 1  | 54181174  | 0.056 | 0.010 | 3.99E-08   | 0.070 | 31.3  | 13794 | 1697 | 881  | 8  | -0.017 | 0.012 | 0.17 | 0.005 | 0.38 | -0.310 | 0.224 | 0.17 | 0.37 | -0.215 | 0.056 | 1.65E-04 |
| cg18216439 | 18 | 35132882  | 0.209 | 0.065 | 0.0013874  | 0.024 | 10.4  | 13311 | 1742 | 916  | 1  | -0.055 | 0.041 | 0.18 | 0.004 | 0.38 | -0.280 | 0.212 | 0.19 | 0.37 | -0.128 | 0.030 | 2.65E-05 |
| cg04535454 | 8  | 144035192 | 0.049 | 0.009 | 2.17E-08   | 0.073 | 32.6  | 17157 | 2585 | 1321 | 16 | -0.009 | 0.006 | 0.18 | 0.004 | 0.38 | -0.175 | 0.129 | 0.18 | 0.37 | -0.134 | 0.034 | 1.02E-04 |
| cg08582801 | 7  | 99588335  | 0.041 | 0.009 | 6.73E-06   | 0.048 | 20.8  | 11898 | 913  | 363  | 7  | -0.014 | 0.011 | 0.19 | 0.004 | 0.38 | -0.332 | 0.247 | 0.18 | 0.37 | -0.232 | 0.056 | 3.89E-05 |
| cg27652925 | 6  | 31740951  | 0.049 | 0.010 | 1.90E-06   | 0.053 | 23.3  | 15655 | 5253 | 2035 | 8  | -0.015 | 0.011 | 0.19 | 0.004 | 0.38 | -0.307 | 0.230 | 0.18 | 0.37 | -0.198 | 0.052 | 1.73E-04 |
| cg09073467 | 1  | 6155515   | 0.073 | 0.006 | 1.34E-26   | 0.240 | 131.2 | 16527 | 2041 | 1179 | 36 | -0.009 | 0.007 | 0.19 | 0.004 | 0.38 | -0.126 | 0.095 | 0.18 | 0.37 | -0.185 | 0.046 | 8.07E-05 |
| cg08239663 | 16 | 52688569  | 0.210 | 0.044 | 2.29E-06   | 0.052 | 23.0  | 15429 | 2052 | 995  | 5  | -0.028 | 0.022 | 0.19 | 0.004 | 0.38 | -0.139 | 0.105 | 0.19 | 0.37 | -0.092 | 0.023 | 1.05E-04 |
| cg26225794 | 7  | 27717723  | 0.148 | 0.043 | 0.00074188 | 0.027 | 11.6  | 14250 | 1939 | 985  | 2  | 0.040  | 0.030 | 0.19 | 0.004 | 0.38 | 0.241  | 0.207 | 0.24 | 0.41 | -0.121 | 0.033 | 3.24E-04 |
| cg04293688 | 2  | 75466188  | 0.058 | 0.007 | 2.15E-14   | 0.131 | 62.8  | 15363 | 2334 | 1330 | 27 | -0.006 | 0.005 | 0.19 | 0.004 | 0.38 | -0.109 | 0.082 | 0.19 | 0.37 | -0.115 | 0.029 | 1.11E-04 |
| cg05202700 | 8  | 38258250  | 0.125 | 0.022 | 2.64E-08   | 0.072 | 32.2  | 12658 | 1326 | 661  | 8  | -0.016 | 0.013 | 0.19 | 0.004 | 0.38 | -0.125 | 0.095 | 0.19 | 0.37 | -0.103 | 0.026 | 1.15E-04 |
| cg15867652 | 17 | 79011277  | 0.119 | 0.012 | 9.22E-22   | 0.198 | 102.9 | 18385 | 2927 | 1635 | 23 | -0.009 | 0.007 | 0.20 | 0.004 | 0.38 | -0.075 | 0.057 | 0.19 | 0.37 | -0.104 | 0.026 | 6.38E-05 |
| cg00903007 | 17 | 34068171  | 0.020 | 0.002 | 2.67E-15   | 0.140 | 67.5  | 13632 | 1860 | 892  | 52 | -0.004 | 0.003 | 0.20 | 0.004 | 0.38 | -0.193 | 0.147 | 0.19 | 0.37 | -0.215 | 0.054 | 9.47E-05 |
| cg13377560 | 22 | 43860820  | 0.071 | 0.010 | 3.25E-12   | 0.110 | 51.5  | 16164 | 2593 | 1472 | 18 | -0.010 | 0.008 | 0.21 | 0.004 | 0.39 | -0.129 | 0.101 | 0.20 | 0.38 | -0.142 | 0.036 | 8.46E-05 |
| cg01095004 | 16 | 88454883  | 0.130 | 0.018 | 2.07E-12   | 0.112 | 52.5  | 21315 | 3131 | 2093 | 12 | -0.014 | 0.011 | 0.21 | 0.004 | 0.39 | -0.107 | 0.084 | 0.20 | 0.38 | -0.105 | 0.028 | 2.43E-04 |
| cg24848724 | 8  | 142578640 | 0.095 | 0.009 | 2.93E-21   | 0.194 | 100.1 | 16785 | 2282 | 1389 | 32 | -0.007 | 0.005 | 0.21 | 0.004 | 0.39 | -0.073 | 0.058 | 0.20 | 0.38 | -0.088 | 0.025 | 3.51E-04 |
| cg01898225 | 15 | 99975141  | 0.062 | 0.006 | 2.03E-19   | 0.178 | 89.8  | 15697 | 2792 | 1539 | 29 | -0.007 | 0.006 | 0.22 | 0.004 | 0.39 | -0.114 | 0.090 | 0.21 | 0.38 | -0.179 | 0.038 | 2.86E-06 |
| cg20018106 | 4  | 21768009  | 0.058 | 0.011 | 6.20E-08   | 0.068 | 30.4  | 16045 | 2280 | 975  | 13 | -0.007 | 0.006 | 0.22 | 0.004 | 0.39 | -0.123 | 0.097 | 0.21 | 0.38 | -0.121 | 0.026 | 5.69E-06 |
| cg18450810 | 17 | 51111066  | 0.214 | 0.045 | 3.11E-06   | 0.051 | 22.4  | 14484 | 2171 | 635  | 4  | -0.034 | 0.027 | 0.22 | 0.004 | 0.39 | -0.157 | 0.127 | 0.21 | 0.38 | -0.104 | 0.028 | 2.82E-04 |
| cg25285919 | 3  | 188312215 | 0.080 | 0.011 | 5.43E-13   | 0.118 | 55.5  | 14200 | 1596 | 1007 | 14 | -0.009 | 0.007 | 0.22 | 0.004 | 0.39 | -0.114 | 0.092 | 0.21 | 0.38 | -0.114 | 0.031 | 2.51E-04 |
| cg18184975 | 20 | 3644192   | 0.076 | 0.014 | 4.39E-08   | 0.070 | 31.1  | 14390 | 2558 | 1274 | 10 | -0.011 | 0.009 | 0.23 | 0.004 | 0.39 | -0.153 | 0.124 | 0.22 | 0.38 | -0.138 | 0.032 | 2.40E-05 |
| cg04131502 | 1  | 2845538   | 0.107 | 0.017 | 4.55E-10   | 0.089 | 40.8  | 17240 | 2079 | 1306 | 9  | -0.014 | 0.012 | 0.25 | 0.003 | 0.42 | -0.134 | 0.113 | 0.24 | 0.41 | -0.136 | 0.033 | 6.26E-05 |
| cg26849382 | 5  | 140901022 | 0.223 | 0.081 | 0.00651404 | 0.018 | 7.5   | 13286 | 1785 | 904  | 1  | 0.049  | 0.042 | 0.25 | 0.003 | 0.42 | 0.213  | 0.191 | 0.27 | 0.43 | 0.060  | 0.025 | 1.83E-02 |
| cg16819051 | 2  | 229173235 | 0.189 | 0.063 | 0.00303083 | 0.021 | 8.9   | 14534 | 2218 | 867  | 1  | -0.045 | 0.040 | 0.26 | 0.003 | 0.42 | -0.235 | 0.208 | 0.26 | 0.43 | -0.112 | 0.030 | 1.86E-04 |
| cg25721832 | 3  | 81913557  | 0.089 | 0.015 | 2.94E-09   | 0.081 | 36.8  | 12811 | 1396 | 484  | 17 | -0.012 | 0.010 | 0.27 | 0.003 | 0.43 | -0.132 | 0.118 | 0.26 | 0.43 | -0.101 | 0.033 | 2.13E-03 |
| cg22509138 | 20 | 44809026  | 0.357 | 0.119 | 0.00283299 | 0.021 | 9.0   | 14092 | 1752 | 957  | 1  | 0.070  | 0.064 | 0.27 | 0.003 | 0.43 | 0.194  | 0.201 | 0.33 | 0.50 | -0.107 | 0.026 | 3.62E-05 |
| cg05808230 | 20 | 61726456  | 0.095 | 0.011 | 1.17E-15   | 0.143 | 69.4  | 18272 | 2767 | 1736 | 19 | -0.009 | 0.008 | 0.27 | 0.003 | 0.43 | -0.092 | 0.083 | 0.27 | 0.43 | -0.131 | 0.032 | 4.96E-05 |
| cg09063835 | 20 | 58181392  | 0.152 | 0.020 | 2.26E-13   | 0.121 | 57.5  | 15305 | 1716 | 1164 | 13 | -0.013 | 0.012 | 0.28 | 0.003 | 0.43 | -0.088 | 0.079 | 0.27 | 0.43 | -0.117 | 0.027 | 1.78E-05 |
| cg06066032 | 13 | 48369175  | 0.370 | 0.116 | 0.00154941 | 0.024 | 10.2  | 14559 | 2328 | 815  | 1  | 0.061  | 0.059 | 0.30 | 0.003 | 0.47 | 0.185  | 0.203 | 0.36 | 0.53 | -0.098 | 0.025 | 7.18E-05 |
| cg05389237 | 9  | 125314173 | 0.135 | 0.019 | 2.83E-12   | 0.111 | 51.9  | 13529 | 1515 | 817  | 17 | -0.010 | 0.010 | 0.30 | 0.003 | 0.47 | -0.078 | 0.074 | 0.29 | 0.46 | -0.096 | 0.024 | 1.04E-04 |
| cg17538538 | 6  | 106825021 | 0.131 | 0.026 | 8.85E-07   | 0.056 | 24.9  | 14420 | 2498 | 1195 | 4  | 0.020  | 0.021 | 0.33 | 0.002 | 0.50 | 0.151  | 0.152 | 0.32 | 0.49 | 0.133  | 0.037 | 3.46E-04 |
| cg23519631 | 12 | 72690355  | 0.111 | 0.022 | 7.26E-07   | 0.057 | 25.3  | 12956 | 1472 | 563  | 8  | -0.016 | 0.016 | 0.33 | 0.002 | 0.50 | -0.144 | 0.144 | 0.32 | 0.49 | -0.164 | 0.034 | 1.82E-06 |
| cg08792976 | 16 | 760528    | 0.103 | 0.011 | 1.48E-19   | 0.179 | 90.6  | 22023 | 2572 | 1696 | 24 | -0.008 | 0.008 | 0.34 | 0.002 | 0.50 | -0.076 | 0.078 | 0.33 | 0.50 | -0.137 | 0.033 | 3.27E-05 |
| cg20623853 | 19 | 1734365   | 0.040 | 0.008 | 2.88E-07   | 0.061 | 27.2  | 17950 | 1888 | 1390 | 13 | -0.006 | 0.006 | 0.34 | 0.002 | 0.50 | -0.132 | 0.135 | 0.33 | 0.50 | -0.148 | 0.036 | 5.67E-05 |
| cg18042910 | 13 | 19662609  | 0.053 | 0.007 | 1.31E-13   | 0.124 | 58.7  | 17061 | 2665 | 1048 | 44 | -0.004 | 0.004 | 0.37 | 0.002 | 0.53 | -0.068 | 0.074 | 0.36 | 0.53 | -0.107 | 0.026 | 4.78E-05 |
| cg14204490 | 8  | 33330967  | 0.035 | 0.006 | 3.81E-10   | 0.090 | 41.2  | 13877 | 1541 | 509  | 27 | 0.006  | 0.007 | 0.37 | 0.002 | 0.53 | 0.176  | 0.204 | 0.39 | 0.55 | -0.222 | 0.056 | 8.23E-05 |
| cg01124546 | 11 | 117515332 | 0.065 | 0.009 | 5.51E-12   | 0.108 | 50.4  | 15525 | 2294 | 1396 | 13 | -0.009 | 0.010 | 0.38 | 0.002 | 0.54 | -0.135 | 0.150 | 0.37 | 0.53 | -0.198 | 0.048 | 4.04E-05 |
| cg00188627 | 3  | 159557779 | 0.133 | 0.022 | 1.50E-09   | 0.084 | 38.2  | 14587 | 1437 | 649  | 8  | 0.012  | 0.014 | 0.40 | 0.002 | 0.56 | 0.089  | 0.104 | 0.39 | 0.55 | 0.105  | 0.030 | 6.05E-04 |
| cg03510150 | 9  | 130690744 | 0.058 | 0.008 | 5.78E-13   | 0.117 | 55.4  | 13396 | 1284 | 730  | 17 | -0.007 | 0.009 | 0.42 | 0.002 | 0.59 | -0.119 | 0.145 | 0.41 | 0.58 | -0.200 | 0.050 | 8.62E-05 |
| cg09701145 | 11 | 2019436   | 0.085 | 0.011 | 7.50E-13   | 0.116 | 54.8  | 17726 | 2869 |      |    |        |       |      |       |      |        |       |      |      |        |       |          |

SUPPLEMENTARY DATA

|            |    |           |       |       |            |       |       |       |      |      |     |        |       |      |       |      |        |       |      |      |        |       |          |
|------------|----|-----------|-------|-------|------------|-------|-------|-------|------|------|-----|--------|-------|------|-------|------|--------|-------|------|------|--------|-------|----------|
| cg00373987 | 22 | 37868968  | 0.228 | 0.056 | 6.16E-05   | 0.038 | 16.4  | 15697 | 2077 | 1308 | 2   | -0.027 | 0.039 | 0.49 | 0.001 | 0.65 | -0.121 | 0.169 | 0.48 | 0.64 | -0.144 | 0.033 | 1.38E-05 |
| cg12161743 | 11 | 76750531  | 0.055 | 0.007 | 2.42E-14   | 0.131 | 62.5  | 13871 | 1984 | 1045 | 23  | -0.004 | 0.005 | 0.49 | 0.001 | 0.65 | -0.065 | 0.093 | 0.48 | 0.64 | -0.147 | 0.033 | 1.38E-05 |
| cg13827123 | 13 | 93971495  | 0.313 | 0.105 | 0.00304799 | 0.021 | 8.9   | 14374 | 2257 | 949  | 1   | 0.036  | 0.054 | 0.50 | 0.001 | 0.66 | 0.116  | 0.185 | 0.53 | 0.68 | -0.100 | 0.024 | 5.07E-05 |
| cg08491066 | 1  | 156030669 | 0.101 | 0.019 | 1.11E-07   | 0.066 | 29.2  | 11201 | 951  | 464  | 7   | -0.010 | 0.016 | 0.51 | 0.001 | 0.66 | -0.104 | 0.153 | 0.50 | 0.66 | -0.157 | 0.038 | 5.39E-05 |
| cg15575356 | 11 | 47616757  | 0.137 | 0.032 | 1.70E-05   | 0.044 | 18.9  | 11864 | 1306 | 471  | 4   | -0.020 | 0.032 | 0.52 | 0.001 | 0.68 | -0.152 | 0.231 | 0.51 | 0.67 | -0.201 | 0.047 | 2.78E-05 |
| cg00078259 | 6  | 2656232   | 0.148 | 0.020 | 2.76E-13   | 0.121 | 57.0  | 16279 | 2501 | 1372 | 11  | -0.008 | 0.012 | 0.53 | 0.001 | 0.68 | -0.051 | 0.080 | 0.52 | 0.68 | -0.105 | 0.027 | 1.50E-04 |
| cg16140890 | 1  | 1082406   | 0.144 | 0.032 | 1.06E-05   | 0.046 | 19.9  | 16090 | 1384 | 843  | 5   | 0.010  | 0.017 | 0.56 | 0.001 | 0.72 | 0.068  | 0.122 | 0.58 | 0.72 | -0.093 | 0.025 | 2.64E-04 |
| cg21927431 | 9  | 134678366 | 0.173 | 0.028 | 2.39E-09   | 0.082 | 37.2  | 14813 | 1885 | 1114 | 6   | -0.012 | 0.021 | 0.58 | 0.001 | 0.73 | -0.076 | 0.136 | 0.58 | 0.72 | -0.127 | 0.034 | 2.49E-04 |
| cg20659588 | 1  | 237963267 | 0.262 | 0.054 | 1.77E-06   | 0.053 | 23.5  | 15158 | 2388 | 1277 | 3   | -0.018 | 0.034 | 0.59 | 0.001 | 0.73 | -0.073 | 0.132 | 0.58 | 0.72 | -0.125 | 0.029 | 2.48E-05 |
| cg13022891 | 9  | 5817706   | 0.054 | 0.006 | 2.68E-17   | 0.158 | 78.2  | 16090 | 1838 | 1205 | 38  | -0.003 | 0.005 | 0.59 | 0.001 | 0.73 | -0.054 | 0.098 | 0.58 | 0.72 | -0.148 | 0.038 | 1.43E-04 |
| cg25903144 | 7  | 13169086  | 0.086 | 0.017 | 3.43E-07   | 0.061 | 26.9  | 15819 | 2225 | 1281 | 10  | -0.004 | 0.008 | 0.59 | 0.001 | 0.73 | -0.052 | 0.095 | 0.59 | 0.72 | -0.083 | 0.023 | 4.29E-04 |
| cg27410679 | 17 | 43866278  | 0.068 | 0.010 | 3.00E-11   | 0.101 | 46.7  | 12078 | 2955 | 549  | 28  | -0.003 | 0.006 | 0.61 | 0.001 | 0.73 | -0.041 | 0.080 | 0.61 | 0.73 | -0.108 | 0.026 | 5.00E-05 |
| cg10883064 | 17 | 60757346  | 0.085 | 0.014 | 1.18E-09   | 0.085 | 38.8  | 12442 | 1144 | 568  | 20  | -0.004 | 0.009 | 0.62 | 0.001 | 0.73 | -0.050 | 0.098 | 0.61 | 0.73 | -0.110 | 0.030 | 2.51E-04 |
| cg11837181 | 1  | 3001002   | 0.101 | 0.026 | 0.00015292 | 0.034 | 14.6  | 17515 | 2132 | 1321 | 3   | -0.009 | 0.018 | 0.62 | 0.001 | 0.73 | -0.092 | 0.180 | 0.61 | 0.73 | -0.127 | 0.033 | 1.51E-04 |
| cg17985533 | 11 | 2019116   | 0.038 | 0.003 | 8.78E-38   | 0.328 | 202.9 | 17722 | 2867 | 1729 | 108 | -0.001 | 0.003 | 0.62 | 0.001 | 0.73 | -0.038 | 0.076 | 0.62 | 0.73 | -0.175 | 0.043 | 5.97E-05 |
| cg21778193 | 1  | 1098070   | 0.189 | 0.067 | 0.00483001 | 0.019 | 8.0   | 16295 | 1400 | 851  | 1   | -0.018 | 0.040 | 0.66 | 0.000 | 0.77 | -0.087 | 0.192 | 0.65 | 0.76 | -0.119 | 0.029 | 4.25E-05 |
| cg05851077 | 9  | 29802712  | 0.146 | 0.033 | 1.68E-05   | 0.044 | 19.0  | 16112 | 2731 | 1143 | 5   | -0.006 | 0.013 | 0.67 | 0.000 | 0.77 | -0.039 | 0.091 | 0.67 | 0.77 | -0.084 | 0.019 | 1.04E-05 |
| cg06981471 | 7  | 142982076 | 0.125 | 0.026 | 1.98E-06   | 0.053 | 23.3  | 10365 | 1303 | 535  | 5   | 0.008  | 0.020 | 0.67 | 0.000 | 0.77 | 0.064  | 0.155 | 0.68 | 0.77 | -0.127 | 0.036 | 4.27E-04 |
| cg12011250 | 1  | 30198037  | 0.065 | 0.008 | 3.19E-16   | 0.148 | 72.4  | 13795 | 2188 | 1217 | 29  | -0.002 | 0.005 | 0.69 | 0.000 | 0.78 | -0.033 | 0.080 | 0.68 | 0.77 | -0.120 | 0.030 | 6.05E-05 |
| cg07728373 | 2  | 229266790 | 0.077 | 0.016 | 1.82E-06   | 0.053 | 23.4  | 14340 | 2115 | 872  | 11  | -0.003 | 0.007 | 0.69 | 0.000 | 0.78 | -0.039 | 0.096 | 0.68 | 0.77 | -0.108 | 0.021 | 5.53E-07 |
| cg16608656 | 11 | 1082797   | 0.103 | 0.033 | 0.00173057 | 0.023 | 9.9   | 16848 | 2415 | 1343 | 2   | -0.008 | 0.020 | 0.70 | 0.000 | 0.78 | -0.072 | 0.184 | 0.69 | 0.78 | -0.112 | 0.029 | 1.47E-04 |
| cg13625403 | 11 | 120088510 | 0.057 | 0.012 | 3.76E-06   | 0.050 | 22.0  | 15102 | 2093 | 1233 | 9   | 0.003  | 0.007 | 0.71 | 0.000 | 0.79 | 0.047  | 0.129 | 0.71 | 0.79 | -0.117 | 0.028 | 4.48E-05 |
| cg00918900 | 1  | 1057335   | 0.087 | 0.012 | 1.22E-12   | 0.114 | 53.7  | 15892 | 1367 | 827  | 21  | -0.003 | 0.007 | 0.71 | 0.000 | 0.79 | -0.031 | 0.083 | 0.71 | 0.79 | -0.124 | 0.029 | 1.83E-05 |
| cg00403246 | 10 | 134794753 | 0.096 | 0.023 | 3.36E-05   | 0.041 | 17.6  | 18305 | 1964 | 1252 | 2   | 0.009  | 0.025 | 0.73 | 0.000 | 0.79 | 0.090  | 0.263 | 0.73 | 0.80 | -0.188 | 0.051 | 2.46E-04 |
| cg11138231 | 7  | 99475824  | 0.111 | 0.017 | 4.91E-11   | 0.099 | 45.6  | 12236 | 880  | 344  | 20  | -0.003 | 0.008 | 0.76 | 0.000 | 0.83 | -0.022 | 0.073 | 0.76 | 0.82 | -0.095 | 0.023 | 4.48E-05 |
| cg08474716 | 16 | 27079640  | 0.206 | 0.029 | 4.42E-12   | 0.109 | 50.9  | 16195 | 2472 | 1481 | 8   | -0.004 | 0.016 | 0.78 | 0.000 | 0.84 | -0.022 | 0.078 | 0.78 | 0.83 | -0.092 | 0.025 | 2.08E-04 |
| cg07203271 | 1  | 53926112  | 0.145 | 0.024 | 2.03E-09   | 0.083 | 37.6  | 14665 | 2120 | 967  | 9   | -0.004 | 0.015 | 0.78 | 0.000 | 0.84 | -0.028 | 0.101 | 0.78 | 0.83 | -0.104 | 0.029 | 4.27E-04 |
| cg25380707 | 15 | 86660946  | 0.252 | 0.080 | 0.00180737 | 0.023 | 9.9   | 17604 | 2562 | 1510 | 1   | -0.010 | 0.040 | 0.81 | 0.000 | 0.85 | -0.043 | 0.176 | 0.81 | 0.85 | -0.086 | 0.024 | 2.83E-04 |
| cg17905524 | 15 | 28305412  | 0.106 | 0.014 | 1.08E-12   | 0.115 | 54.0  | 11317 | 1447 | 661  | 17  | -0.002 | 0.010 | 0.82 | 0.000 | 0.86 | -0.021 | 0.094 | 0.82 | 0.86 | -0.127 | 0.030 | 2.77E-05 |
| cg18616558 | 7  | 158798592 | 0.080 | 0.014 | 1.49E-08   | 0.074 | 33.4  | 14247 | 1918 | 902  | 20  | -0.001 | 0.006 | 0.92 | 0.000 | 0.95 | -0.008 | 0.073 | 0.92 | 0.95 | -0.071 | 0.020 | 4.52E-04 |
| cg04140215 | 2  | 60540175  | 0.210 | 0.075 | 0.00563409 | 0.018 | 7.7   | 15077 | 1764 | 1102 | 1   | 0.004  | 0.050 | 0.94 | 0.000 | 0.96 | 0.021  | 0.265 | 0.94 | 0.97 | -0.119 | 0.031 | 1.48E-04 |
| cg26238771 | 19 | 592158    | 0.117 | 0.011 | 3.43E-23   | 0.211 | 111.2 | 17193 | 2642 | 2036 | 20  | 0.000  | 0.009 | 0.98 | 0.000 | 0.99 | -0.002 | 0.080 | 0.98 | 0.99 | -0.139 | 0.036 | 1.21E-04 |
| cg05347757 | 15 | 51121020  | 0.103 | 0.034 | 0.00251697 | 0.022 | 9.2   | 13001 | 1995 | 637  | 3   | 0.000  | 0.018 | 0.98 | 0.000 | 0.99 | -0.004 | 0.173 | 0.98 | 0.99 | -0.083 | 0.025 | 1.10E-03 |
| cg02688867 | 12 | 133019854 | 0.180 | 0.055 | 0.0012479  | 0.025 | 10.6  | 16623 | 2355 | 1394 | 2   | -0.001 | 0.033 | 0.98 | 0.000 | 0.99 | -0.004 | 0.179 | 0.98 | 0.99 | -0.100 | 0.028 | 4.92E-04 |
| cg15952840 | 8  | 11451312  | 0.159 | 0.035 | 5.66E-06   | 0.048 | 21.1  | 21931 | 3018 | 2084 | 3   | 0.000  | 0.022 | 0.99 | 0.000 | 0.99 | 0.003  | 0.145 | 0.99 | 0.99 | -0.128 | 0.030 | 2.32E-05 |
| cg00045690 | 6  | 32825897  |       |       |            |       |       | 19525 | 8434 | 2923 | 0   |        |       |      |       |      |        |       |      |      | -0.086 | 0.022 | 1.12E-04 |
| cg01216882 | 20 | 31804277  |       |       |            |       |       | 14128 | 1327 | 702  | 0   |        |       |      |       |      |        |       |      |      | -0.137 | 0.031 | 9.94E-06 |
| cg01530082 | 6  | 32784327  |       |       |            |       |       | 19703 | 8668 | 2934 | 0   |        |       |      |       |      |        |       |      |      | -0.107 | 0.026 | 4.05E-05 |
| cg01615861 | 16 | 85513978  |       |       |            |       |       | 21138 | 2881 | 2231 | 0   |        |       |      |       |      |        |       |      |      | -0.283 | 0.080 | 4.45E-04 |
| cg02831474 | 10 | 1783879   |       |       |            |       |       | 18860 | 3144 | 1828 | 0   |        |       |      |       |      |        |       |      |      | -0.113 | 0.024 | 3.12E-06 |
| cg03275961 | 9  | 90386329  |       |       |            |       |       | 15207 | 2428 | 1223 | 0   |        |       |      |       |      |        |       |      |      | -0.161 | 0.040 | 5.57E-05 |
| cg03710412 | 8  | 142938779 |       |       |            |       |       | 17500 | 2608 | 1446 | 0   |        |       |      |       |      |        |       |      |      | -0.091 | 0.026 | 4.85E-04 |
| cg04847540 | 1  | 182754070 |       |       |            |       |       | 13816 | 1976 | 812  | 0   |        |       |      |       |      |        |       |      |      | -0.112 | 0.028 | 7.64E-05 |
| cg04907218 | 12 | 132826672 |       |       |            |       |       | 16467 | 2098 | 1300 | 0   |        |       |      |       |      |        |       |      |      | -0.118 | 0.030 | 9.09E-05 |
| cg05444304 | 2  | 31442675  |       |       |            |       |       | 15973 | 2123 | 1458 | 0   |        |       |      |       |      |        |       |      |      | 0.133  | 0.039 | 6.39E-04 |
| cg05790369 | 17 | 33202007  |       |       |            |       |       | 14788 | 2007 | 1086 | 0   |        |       |      |       |      |        |       |      |      | -0.115 | 0.030 | 1.90E-04 |
| cg06343669 | 12 | 132690782 |       |       |            |       |       | 16014 | 2044 | 1320 | 0   |        |       |      |       |      |        |       |      |      | -0.117 | 0.028 | 2.72E-05 |
| cg06495184 | 19 | 406256    |       |       |            |       |       | 13720 | 2023 | 1579 | 0   |        |       |      |       |      |        |       |      |      | -0.142 | 0.035 | 5.34E-05 |
| cg06830529 | 9  | 124960107 |       |       |            |       |       | 14549 | 1938 | 1035 | 0   |        |       |      |       |      |        |       |      |      | -0.139 | 0.037 | 1.73E-04 |
| cg07080246 | 13 | 63306618  |       |       |            |       |       | 13919 | 2164 | 705  | 0   |        |       |      |       |      |        |       |      |      | -0.076 | 0.020 | 1.22E-04 |
| cg07686906 | 1  | 3353825   |       |       |            |       |       | 18958 | 2698 | 1695 | 0   |        |       |      |       |      |        |       |      |      | -0.150 | 0.037 | 5.70E-05 |
| cg07865738 | 2  | 3649447   |       |       |            |       |       | 15986 | 2592 | 1436 | 0   |        |       |      |       |      |        |       |      |      | -0.095 | 0.024 | 6.57E-05 |

SUPPLEMENTARY DATA

|            |    |           |  |  |  |  |  |       |      |      |   |  |  |  |  |  |  |        |       |          |
|------------|----|-----------|--|--|--|--|--|-------|------|------|---|--|--|--|--|--|--|--------|-------|----------|
| cg08058801 | 3  | 147974120 |  |  |  |  |  | 14142 | 1723 | 693  | 0 |  |  |  |  |  |  | -0.114 | 0.026 | 1.13E-05 |
| cg08357744 | 17 | 37559321  |  |  |  |  |  | 13259 | 1346 | 609  | 0 |  |  |  |  |  |  | -0.084 | 0.023 | 2.31E-04 |
| cg08372350 | 16 | 88943191  |  |  |  |  |  | 22238 | 2702 | 1867 | 0 |  |  |  |  |  |  | -0.107 | 0.028 | 1.59E-04 |
| cg08389995 | 3  | 131645295 |  |  |  |  |  | 14602 | 2835 | 1125 | 0 |  |  |  |  |  |  | -0.083 | 0.023 | 3.49E-04 |
| cg09181711 | 19 | 51327196  |  |  |  |  |  | 16264 | 2335 | 1602 | 0 |  |  |  |  |  |  | -0.136 | 0.029 | 2.61E-06 |
| cg09851596 | 8  | 143545214 |  |  |  |  |  | 18124 | 2792 | 1362 | 0 |  |  |  |  |  |  | -0.177 | 0.044 | 7.97E-05 |
| cg10877514 | 17 | 292539    |  |  |  |  |  | 12641 | 1872 | 1292 | 0 |  |  |  |  |  |  | -0.105 | 0.028 | 1.79E-04 |
| cg11086223 | 18 | 11487579  |  |  |  |  |  | 16274 | 2395 | 1276 | 0 |  |  |  |  |  |  | -0.135 | 0.034 | 6.79E-05 |
| cg11177743 | 20 | 21545361  |  |  |  |  |  | 13270 | 1160 | 444  | 0 |  |  |  |  |  |  | -0.138 | 0.033 | 3.15E-05 |
| cg11294782 | 3  | 10487409  |  |  |  |  |  | 15223 | 2264 | 1314 | 0 |  |  |  |  |  |  | -0.152 | 0.040 | 1.69E-04 |
| cg11416433 | 15 | 25429261  |  |  |  |  |  | 16557 | 1988 | 1141 | 0 |  |  |  |  |  |  | -0.201 | 0.044 | 6.72E-06 |
| cg11821795 | 22 | 47611604  |  |  |  |  |  | 19073 | 2440 | 1408 | 0 |  |  |  |  |  |  | -0.109 | 0.027 | 4.59E-05 |
| cg12697796 | 10 | 49954016  |  |  |  |  |  | 15686 | 2331 | 1086 | 0 |  |  |  |  |  |  | -0.179 | 0.041 | 2.03E-05 |
| cg13116906 | 12 | 119552989 |  |  |  |  |  | 14166 | 2319 | 1181 | 0 |  |  |  |  |  |  | -0.105 | 0.027 | 1.44E-04 |
| cg13254480 | 16 | 86513248  |  |  |  |  |  | 23316 | 3570 | 2722 | 0 |  |  |  |  |  |  | -0.073 | 0.020 | 2.91E-04 |
| cg13257690 | 14 | 101908752 |  |  |  |  |  | 15386 | 2170 | 1265 | 0 |  |  |  |  |  |  | -0.178 | 0.046 | 1.17E-04 |
| cg13480617 | 5  | 35230725  |  |  |  |  |  | 14639 | 2107 | 978  | 0 |  |  |  |  |  |  | -0.121 | 0.038 | 1.49E-03 |
| cg14494450 | 1  | 4190881   |  |  |  |  |  | 15856 | 2958 | 1567 | 0 |  |  |  |  |  |  | -0.116 | 0.027 | 2.07E-05 |
| cg14757962 | 5  | 2176287   |  |  |  |  |  | 19312 | 3591 | 2168 | 0 |  |  |  |  |  |  | -0.108 | 0.030 | 3.06E-04 |
| cg14759277 | 17 | 48674158  |  |  |  |  |  | 13790 | 1755 | 1128 | 0 |  |  |  |  |  |  | -0.164 | 0.041 | 7.62E-05 |
| cg14886500 | 6  | 23447204  |  |  |  |  |  | 17748 | 2646 | 1490 | 0 |  |  |  |  |  |  | -0.080 | 0.023 | 7.30E-04 |
| cg16513326 | 8  | 10877312  |  |  |  |  |  | 21573 | 3120 | 2033 | 0 |  |  |  |  |  |  | -0.111 | 0.032 | 5.03E-04 |
| cg16857113 | 3  | 1133865   |  |  |  |  |  | 18339 | 2963 | 1779 | 0 |  |  |  |  |  |  | -0.114 | 0.029 | 1.12E-04 |
| cg17224410 | 9  | 137852661 |  |  |  |  |  | 19804 | 2883 | 1965 | 0 |  |  |  |  |  |  | -0.123 | 0.033 | 2.00E-04 |
| cg17226458 | 6  | 33780022  |  |  |  |  |  | 16101 | 2493 | 1395 | 0 |  |  |  |  |  |  | -0.145 | 0.039 | 2.71E-04 |
| cg17587481 | 5  | 152603672 |  |  |  |  |  | 14222 | 2224 | 764  | 0 |  |  |  |  |  |  | -0.103 | 0.024 | 1.78E-05 |
| cg18108190 | 19 | 2727822   |  |  |  |  |  | 18307 | 2844 | 1847 | 0 |  |  |  |  |  |  | -0.142 | 0.033 | 2.05E-05 |
| cg18233010 | 10 | 114911413 |  |  |  |  |  | 14248 | 1705 | 1135 | 0 |  |  |  |  |  |  | 0.170  | 0.045 | 2.13E-04 |
| cg18617770 | 12 | 133035939 |  |  |  |  |  | 16438 | 2356 | 1404 | 0 |  |  |  |  |  |  | -0.160 | 0.037 | 2.04E-05 |
| cg18650968 | 4  | 176340837 |  |  |  |  |  | 14564 | 1524 | 726  | 0 |  |  |  |  |  |  | -0.100 | 0.028 | 4.36E-04 |
| cg19450046 | 21 | 45712938  |  |  |  |  |  | 18589 | 2432 | 1382 | 0 |  |  |  |  |  |  | -0.138 | 0.036 | 1.66E-04 |
| cg20112984 | 10 | 1447183   |  |  |  |  |  | 18134 | 2767 | 1723 | 0 |  |  |  |  |  |  | -0.103 | 0.027 | 2.03E-04 |
| cg21307723 | 1  | 245215135 |  |  |  |  |  | 15619 | 2326 | 1412 | 0 |  |  |  |  |  |  | 0.143  | 0.038 | 2.22E-04 |
| cg23016281 | 22 | 27616620  |  |  |  |  |  | 17311 | 3036 | 1986 | 0 |  |  |  |  |  |  | -0.092 | 0.025 | 2.60E-04 |
| cg23359229 | 13 | 29976597  |  |  |  |  |  | 15238 | 2418 | 1020 | 0 |  |  |  |  |  |  | -0.110 | 0.026 | 2.82E-05 |
| cg23536293 | 12 | 99524459  |  |  |  |  |  | 13533 | 1605 | 925  | 0 |  |  |  |  |  |  | -0.071 | 0.021 | 6.41E-04 |
| cg23561197 | 5  | 125852064 |  |  |  |  |  | 15210 | 2226 | 1108 | 0 |  |  |  |  |  |  | -0.106 | 0.030 | 4.06E-04 |
| cg25314607 | 5  | 2148308   |  |  |  |  |  | 19252 | 3620 | 2202 | 0 |  |  |  |  |  |  | -0.122 | 0.030 | 6.85E-05 |
| cg26178126 | 1  | 37740931  |  |  |  |  |  | 14242 | 2023 | 983  | 0 |  |  |  |  |  |  | -0.125 | 0.031 | 6.10E-05 |
| cg27332583 | 18 | 35150602  |  |  |  |  |  | 13359 | 1749 | 916  | 0 |  |  |  |  |  |  | -0.175 | 0.041 | 2.12E-05 |

SUPPLEMENTARY DATA

**Supplementary Table 5.** Results from Mendelian randomization analyses using GRS representing insulin sensitivity (8 SNPs) associations with methylation levels at CpG sites identified in Model 1

| CpG        | chr   | pos       | Maternal GRS8 (raw) association with placenta methylation |       |         |         |
|------------|-------|-----------|-----------------------------------------------------------|-------|---------|---------|
|            |       |           | estimate                                                  | SE    | P_value | Rsquare |
| cg12161743 | chr11 | 76750531  | 0.048                                                     | 0.022 | 0.03    | 0.0112  |
| cg13625403 | chr11 | 120008510 | -0.041                                                    | 0.026 | 0.12    | 0.0059  |
| cg04293688 | chr2  | 75466188  | -0.039                                                    | 0.026 | 0.13    | 0.0056  |
| cg01216882 | chr20 | 31804277  | 0.035                                                     | 0.024 | 0.15    | 0.0051  |
| cg13254480 | chr16 | 86513248  | 0.053                                                     | 0.038 | 0.16    | 0.0047  |
| cg26225794 | chr7  | 27717723  | -0.030                                                    | 0.023 | 0.19    | 0.0042  |
| cg13022891 | chr9  | 5817706   | -0.024                                                    | 0.019 | 0.22    | 0.0036  |
| cg06830529 | chr9  | 124960107 | 0.025                                                     | 0.021 | 0.23    | 0.0034  |
| cg26178126 | chr1  | 37740931  | 0.029                                                     | 0.024 | 0.24    | 0.0034  |
| cg09063835 | chr20 | 58181392  | 0.032                                                     | 0.027 | 0.25    | 0.0032  |
| cg23519631 | chr12 | 72690355  | 0.026                                                     | 0.022 | 0.25    | 0.0032  |
| cg16853336 | chr3  | 149396490 | -0.016                                                    | 0.015 | 0.29    | 0.0026  |
| cg07080246 | chr13 | 63306618  | -0.038                                                    | 0.038 | 0.32    | 0.0023  |
| cg12760575 | chr9  | 139158654 | -0.019                                                    | 0.019 | 0.33    | 0.0023  |
| cg07435932 | chr13 | 19648633  | 0.030                                                     | 0.031 | 0.33    | 0.0023  |
| cg06343669 | chr12 | 132690782 | -0.025                                                    | 0.027 | 0.36    | 0.0020  |
| cg24848724 | chr8  | 142578640 | 0.028                                                     | 0.031 | 0.36    | 0.0020  |
| cg18616558 | chr7  | 158798592 | 0.033                                                     | 0.037 | 0.37    | 0.0019  |
| cg18617770 | chr12 | 133035939 | -0.018                                                    | 0.020 | 0.38    | 0.0019  |
| cg07728373 | chr2  | 229266790 | -0.031                                                    | 0.035 | 0.38    | 0.0018  |
| cg03275961 | chr9  | 90386329  | 0.016                                                     | 0.019 | 0.40    | 0.0017  |
| cg16340422 | chr17 | 17110120  | 0.021                                                     | 0.026 | 0.41    | 0.0016  |
| cg00903007 | chr17 | 34068171  | -0.011                                                    | 0.014 | 0.42    | 0.0016  |
| cg06077821 | chr5  | 180048893 | -0.017                                                    | 0.022 | 0.43    | 0.0015  |
| cg12011250 | chr1  | 30198037  | -0.020                                                    | 0.025 | 0.43    | 0.0015  |
| cg09640571 | chr16 | 88388040  | 0.012                                                     | 0.015 | 0.43    | 0.0015  |
| cg11821795 | chr22 | 47611604  | 0.021                                                     | 0.028 | 0.46    | 0.0013  |
| cg09181711 | chr19 | 51327196  | -0.018                                                    | 0.026 | 0.48    | 0.0012  |
| cg24738497 | chr19 | 36005395  | -0.016                                                    | 0.022 | 0.48    | 0.0012  |
| cg17587481 | chr5  | 152603672 | -0.021                                                    | 0.031 | 0.50    | 0.0011  |
| cg00460471 | chr2  | 61437605  | -0.018                                                    | 0.027 | 0.50    | 0.0011  |
| cg18216439 | chr18 | 35132882  | 0.017                                                     | 0.025 | 0.50    | 0.0011  |
| cg14440140 | chr9  | 140177567 | 0.017                                                     | 0.025 | 0.51    | 0.0010  |
| cg12697796 | chr10 | 49954016  | 0.012                                                     | 0.018 | 0.51    | 0.0010  |
| cg00386725 | chr1  | 18617791  | 0.011                                                     | 0.017 | 0.52    | 0.0010  |
| cg05790369 | chr17 | 33202007  | 0.016                                                     | 0.025 | 0.52    | 0.0010  |
| cg27410679 | chr17 | 43866278  | 0.018                                                     | 0.029 | 0.53    | 0.0010  |
| cg08792976 | chr16 | 760528    | -0.014                                                    | 0.023 | 0.53    | 0.0009  |
| cg10877514 | chr17 | 292539    | 0.017                                                     | 0.027 | 0.53    | 0.0009  |
| cg18450810 | chr17 | 51111066  | 0.016                                                     | 0.026 | 0.53    | 0.0009  |
| cg06066032 | chr13 | 48369175  | 0.019                                                     | 0.031 | 0.54    | 0.0009  |
| cg18861231 | chr3  | 152057943 | -0.018                                                    | 0.030 | 0.54    | 0.0009  |
| cg10964639 | chr16 | 24043296  | 0.014                                                     | 0.024 | 0.55    | 0.0008  |
| cg02384870 | chr2  | 216161208 | 0.018                                                     | 0.031 | 0.56    | 0.0008  |
| cg17226458 | chr6  | 33780022  | 0.011                                                     | 0.019 | 0.56    | 0.0008  |
| cg00373987 | chr22 | 37868968  | -0.013                                                    | 0.023 | 0.57    | 0.0008  |
| cg01864178 | chr20 | 44662890  | -0.014                                                    | 0.026 | 0.58    | 0.0008  |
| cg24073146 | chr11 | 2543204   | -0.010                                                    | 0.018 | 0.58    | 0.0007  |
| cg24475484 | chr8  | 1625395   | 0.016                                                     | 0.030 | 0.58    | 0.0007  |
| cg27652925 | chr6  | 31740951  | 0.008                                                     | 0.014 | 0.59    | 0.0007  |
| cg23536293 | chr12 | 99524459  | 0.020                                                     | 0.037 | 0.60    | 0.0007  |
| cg05808230 | chr20 | 61726456  | 0.012                                                     | 0.023 | 0.60    | 0.0007  |
| cg21396983 | chr16 | 1275423   | 0.013                                                     | 0.025 | 0.61    | 0.0006  |
| cg25380707 | chr15 | 86660946  | 0.016                                                     | 0.032 | 0.62    | 0.0006  |
| cg09701145 | chr11 | 2019436   | -0.010                                                    | 0.019 | 0.62    | 0.0006  |
| cg08058801 | chr3  | 147974120 | 0.015                                                     | 0.029 | 0.62    | 0.0006  |
| cg15952840 | chr8  | 11451312  | 0.012                                                     | 0.025 | 0.62    | 0.0006  |
| cg08582801 | chr7  | 99588335  | 0.007                                                     | 0.013 | 0.62    | 0.0006  |
| cg00918900 | chr1  | 1057335   | 0.012                                                     | 0.026 | 0.63    | 0.0005  |
| cg12658750 | chr18 | 75499382  | 0.009                                                     | 0.019 | 0.63    | 0.0005  |
| cg15575356 | chr11 | 47616757  | -0.008                                                    | 0.016 | 0.64    | 0.0005  |
| cg20659588 | chr1  | 237963267 | -0.012                                                    | 0.025 | 0.64    | 0.0005  |
| cg02287371 | chr5  | 1246274   | -0.013                                                    | 0.027 | 0.64    | 0.0005  |
| cg16140890 | chr1  | 1082406   | 0.014                                                     | 0.030 | 0.65    | 0.0005  |
| cg26849382 | chr5  | 140901022 | 0.013                                                     | 0.030 | 0.65    | 0.0005  |
| cg03710412 | chr8  | 142938779 | -0.013                                                    | 0.029 | 0.66    | 0.0005  |
| cg20623853 | chr19 | 1734365   | 0.009                                                     | 0.021 | 0.66    | 0.0005  |
| cg01124546 | chr11 | 117515332 | -0.007                                                    | 0.016 | 0.66    | 0.0005  |
| cg26238771 | chr19 | 592158    | 0.009                                                     | 0.021 | 0.66    | 0.0005  |
| cg08389995 | chr3  | 131645295 | -0.014                                                    | 0.033 | 0.66    | 0.0005  |
| cg13257690 | chr14 | 101908752 | 0.007                                                     | 0.016 | 0.67    | 0.0004  |
| cg17756860 | chr4  | 110510374 | -0.011                                                    | 0.027 | 0.67    | 0.0004  |

# SUPPLEMENTARY DATA

|            |       |           |        |       |      |        |
|------------|-------|-----------|--------|-------|------|--------|
| cg01530082 | chr6  | 32784327  | -0.012 | 0.029 | 0.67 | 0.0004 |
| cg00045690 | chr6  | 32825897  | 0.014  | 0.034 | 0.67 | 0.0004 |
| cg14839558 | chr1  | 1874488   | 0.012  | 0.028 | 0.67 | 0.0004 |
| cg25314607 | chr5  | 2148308   | 0.011  | 0.025 | 0.67 | 0.0004 |
| cg00781180 | chr16 | 73984002  | -0.011 | 0.026 | 0.67 | 0.0004 |
| cg08474716 | chr16 | 27079640  | 0.013  | 0.031 | 0.67 | 0.0004 |
| cg13480617 | chr5  | 35230725  | 0.008  | 0.020 | 0.67 | 0.0004 |
| cg11416433 | chr15 | 25429261  | 0.007  | 0.017 | 0.67 | 0.0004 |
| cg17538538 | chr6  | 106825021 | 0.009  | 0.020 | 0.67 | 0.0004 |
| cg05775586 | chr9  | 28889354  | -0.012 | 0.029 | 0.68 | 0.0004 |
| cg08737919 | chr12 | 108840669 | 0.010  | 0.026 | 0.69 | 0.0004 |
| cg01618245 | chr20 | 61990279  | 0.012  | 0.030 | 0.69 | 0.0004 |
| cg21307723 | chr1  | 245215135 | 0.008  | 0.019 | 0.69 | 0.0004 |
| cg20018106 | chr4  | 21768009  | -0.011 | 0.028 | 0.70 | 0.0004 |
| cg02831474 | chr10 | 1783879   | 0.012  | 0.031 | 0.70 | 0.0004 |
| cg04535454 | chr8  | 144035192 | 0.008  | 0.022 | 0.70 | 0.0004 |
| cg08491066 | chr1  | 156030669 | 0.007  | 0.019 | 0.70 | 0.0003 |
| cg12673377 | chr7  | 1388271   | 0.008  | 0.021 | 0.70 | 0.0003 |
| cg07203271 | chr1  | 53926112  | -0.010 | 0.026 | 0.71 | 0.0003 |
| cg09319487 | chr20 | 56771178  | 0.009  | 0.025 | 0.71 | 0.0003 |
| cg23359229 | chr13 | 29976597  | 0.011  | 0.029 | 0.71 | 0.0003 |
| cg23521973 | chr10 | 125117429 | 0.009  | 0.024 | 0.72 | 0.0003 |
| cg01948226 | chr6  | 32829208  | 0.009  | 0.025 | 0.72 | 0.0003 |
| cg18184975 | chr20 | 3644192   | 0.008  | 0.023 | 0.72 | 0.0003 |
| cg13116906 | chr12 | 119552989 | 0.010  | 0.027 | 0.73 | 0.0003 |
| cg04131502 | chr1  | 2845583   | 0.008  | 0.023 | 0.73 | 0.0003 |
| cg04907218 | chr12 | 132826672 | -0.009 | 0.025 | 0.74 | 0.0003 |
| cg21778193 | chr1  | 1098070   | 0.009  | 0.026 | 0.74 | 0.0003 |
| cg11855710 | chr19 | 29768180  | -0.008 | 0.024 | 0.75 | 0.0002 |
| cg26037026 | chr7  | 1641922   | -0.006 | 0.020 | 0.75 | 0.0002 |
| cg25903144 | chr7  | 131609806 | 0.010  | 0.033 | 0.76 | 0.0002 |
| cg13377560 | chr22 | 43860820  | -0.006 | 0.021 | 0.76 | 0.0002 |
| cg16444062 | chr16 | 2770298   | 0.009  | 0.029 | 0.76 | 0.0002 |
| cg27625886 | chr20 | 62060443  | -0.008 | 0.029 | 0.77 | 0.0002 |
| cg01898225 | chr15 | 99975141  | -0.006 | 0.019 | 0.77 | 0.0002 |
| cg07865738 | chr2  | 3649447   | -0.009 | 0.032 | 0.78 | 0.0002 |
| cg23561197 | chr5  | 125852064 | -0.007 | 0.025 | 0.79 | 0.0002 |
| cg14361947 | chr9  | 140780551 | 0.004  | 0.015 | 0.79 | 0.0002 |
| cg08099672 | chr9  | 139944162 | -0.005 | 0.021 | 0.79 | 0.0002 |
| cg08357744 | chr17 | 37559321  | 0.008  | 0.034 | 0.80 | 0.0002 |
| cg03568769 | chr11 | 1800837   | 0.006  | 0.023 | 0.80 | 0.0001 |
| cg16857113 | chr3  | 1133865   | -0.006 | 0.026 | 0.81 | 0.0001 |
| cg18682781 | chr5  | 176277687 | 0.007  | 0.027 | 0.81 | 0.0001 |
| cg25721832 | chr3  | 81913557  | -0.006 | 0.023 | 0.81 | 0.0001 |
| cg27332583 | chr18 | 35150602  | -0.004 | 0.019 | 0.81 | 0.0001 |
| cg11294782 | chr3  | 10487409  | 0.004  | 0.019 | 0.82 | 0.0001 |
| cg08511578 | chr10 | 1403938   | -0.007 | 0.030 | 0.82 | 0.0001 |
| cg07686906 | chr1  | 3353825   | 0.005  | 0.020 | 0.82 | 0.0001 |
| cg23016281 | chr22 | 27616620  | -0.007 | 0.030 | 0.83 | 0.0001 |
| cg08149223 | chr10 | 50507130  | -0.004 | 0.016 | 0.83 | 0.0001 |
| cg24600306 | chr20 | 61990671  | 0.004  | 0.016 | 0.83 | 0.0001 |
| cg02688867 | chr12 | 133019854 | -0.006 | 0.026 | 0.83 | 0.0001 |
| cg05444304 | chr2  | 31442675  | 0.004  | 0.020 | 0.83 | 0.0001 |
| cg05389237 | chr9  | 125314173 | 0.006  | 0.031 | 0.84 | 0.0001 |
| cg17985533 | chr11 | 2019116   | 0.003  | 0.017 | 0.84 | 0.0001 |
| cg00389386 | chr1  | 6188136   | 0.003  | 0.017 | 0.84 | 0.0001 |
| cg13827123 | chr13 | 93971495  | -0.006 | 0.031 | 0.85 | 0.0001 |
| cg17905524 | chr15 | 28305412  | 0.005  | 0.025 | 0.85 | 0.0001 |
| cg11177743 | chr20 | 21545361  | 0.004  | 0.023 | 0.86 | 0.0001 |
| cg00046877 | chr22 | 19702664  | 0.002  | 0.013 | 0.86 | 0.0001 |
| cg11138231 | chr7  | 99475824  | 0.006  | 0.033 | 0.86 | 0.0001 |
| cg06981471 | chr7  | 142982076 | -0.004 | 0.021 | 0.86 | 0.0001 |
| cg14757962 | chr5  | 2176287   | -0.004 | 0.025 | 0.87 | 0.0001 |
| cg00078259 | chr6  | 2656232   | 0.004  | 0.027 | 0.87 | 0.0001 |
| cg00188627 | chr3  | 15955779  | 0.004  | 0.025 | 0.88 | 0.0001 |
| cg08372350 | chr16 | 88943191  | -0.004 | 0.027 | 0.88 | 0.0001 |
| cg14886500 | chr6  | 23447204  | -0.005 | 0.032 | 0.88 | 0.0001 |
| cg06751809 | chr3  | 105047227 | 0.005  | 0.037 | 0.88 | 0.0001 |
| cg17224410 | chr9  | 137852661 | -0.003 | 0.023 | 0.89 | 0.0000 |
| cg13449257 | chr9  | 137355128 | 0.003  | 0.022 | 0.89 | 0.0000 |
| cg18650968 | chr4  | 176340837 | -0.004 | 0.027 | 0.89 | 0.0000 |
| cg06429120 | chr16 | 86309214  | 0.005  | 0.036 | 0.89 | 0.0000 |
| cg24857040 | chr13 | 113565214 | -0.003 | 0.024 | 0.89 | 0.0000 |
| cg16513326 | chr8  | 10877312  | -0.003 | 0.024 | 0.89 | 0.0000 |
| cg20112984 | chr10 | 1447183   | -0.004 | 0.028 | 0.90 | 0.0000 |
| cg16608656 | chr11 | 1082797   | -0.003 | 0.026 | 0.90 | 0.0000 |



SUPPLEMENTARY DATA

|            |       |           |        |       |      |        |
|------------|-------|-----------|--------|-------|------|--------|
| cg19450046 | chr21 | 45712938  | -0.003 | 0.021 | 0.90 | 0.0000 |
| cg09073467 | chr1  | 6155515   | -0.002 | 0.016 | 0.91 | 0.0000 |
| cg08204714 | chr16 | 87726461  | -0.002 | 0.015 | 0.91 | 0.0000 |
| cg14494450 | chr1  | 4190881   | -0.003 | 0.028 | 0.92 | 0.0000 |
| cg00403246 | chr10 | 134794753 | 0.002  | 0.015 | 0.92 | 0.0000 |
| cg21927431 | chr9  | 134678366 | -0.002 | 0.022 | 0.92 | 0.0000 |
| cg03510150 | chr9  | 130690744 | -0.002 | 0.015 | 0.92 | 0.0000 |
| cg14204490 | chr8  | 33330967  | 0.001  | 0.013 | 0.92 | 0.0000 |
| cg11086223 | chr18 | 11487579  | 0.002  | 0.022 | 0.93 | 0.0000 |
| cg21347874 | chr17 | 77122733  | 0.002  | 0.026 | 0.93 | 0.0000 |
| cg20612875 | chr17 | 1094308   | 0.001  | 0.015 | 0.94 | 0.0000 |
| cg14759277 | chr17 | 48674158  | -0.001 | 0.018 | 0.94 | 0.0000 |
| cg05851077 | chr9  | 29802712  | 0.003  | 0.040 | 0.94 | 0.0000 |
| cg05202700 | chr8  | 38258250  | -0.002 | 0.028 | 0.94 | 0.0000 |
| cg11837181 | chr1  | 3001002   | -0.002 | 0.023 | 0.94 | 0.0000 |
| cg04847540 | chr1  | 182754070 | -0.002 | 0.027 | 0.95 | 0.0000 |
| cg08239663 | chr16 | 52688569  | -0.002 | 0.032 | 0.95 | 0.0000 |
| cg13463516 | chr9  | 138632121 | -0.001 | 0.021 | 0.95 | 0.0000 |
| cg22509138 | chr20 | 44809026  | -0.002 | 0.029 | 0.95 | 0.0000 |
| cg04140215 | chr2  | 60540175  | 0.001  | 0.024 | 0.96 | 0.0000 |
| cg10883064 | chr17 | 60757346  | -0.001 | 0.025 | 0.96 | 0.0000 |
| cg15867652 | chr17 | 79011277  | -0.002 | 0.029 | 0.96 | 0.0000 |
| cg01095004 | chr16 | 88454883  | 0.001  | 0.027 | 0.96 | 0.0000 |
| cg09851596 | chr8  | 143545214 | 0.001  | 0.017 | 0.97 | 0.0000 |
| cg24064348 | chr1  | 54181174  | 0.000  | 0.013 | 0.97 | 0.0000 |
| cg18042910 | chr13 | 19662609  | 0.001  | 0.029 | 0.98 | 0.0000 |
| cg01615861 | chr16 | 85513978  | 0.000  | 0.009 | 0.98 | 0.0000 |
| cg00875983 | chr11 | 3240213   | 0.000  | 0.016 | 0.98 | 0.0000 |
| cg06495184 | chr19 | 406256    | -0.001 | 0.021 | 0.98 | 0.0000 |
| cg18233010 | chr10 | 114911413 | 0.000  | 0.017 | 0.98 | 0.0000 |
| cg12193237 | chr19 | 3907913   | 0.000  | 0.021 | 0.98 | 0.0000 |
| cg16819051 | chr2  | 229173235 | 0.000  | 0.025 | 0.99 | 0.0000 |
| cg11765907 | chr20 | 43103949  | 0.000  | 0.015 | 0.99 | 0.0000 |
| cg25285919 | chr3  | 188312215 | 0.000  | 0.024 | 0.99 | 0.0000 |
| cg11586089 | chr14 | 66644923  | 0.000  | 0.025 | 0.99 | 0.0000 |
| cg03699074 | chr16 | 88849875  | 0.000  | 0.030 | 0.99 | 0.0000 |
| cg18108190 | chr19 | 2727822   | 0.000  | 0.023 | 0.99 | 0.0000 |
| cg05347757 | chr15 | 51121020  | 0.000  | 0.030 | 1.00 | 0.0000 |
| cg12954267 | chr6  | 33093109  | 0.000  | 0.030 | 1.00 | 0.0000 |
| cg02110836 | chr17 | 71953083  | 0.000  | 0.013 | 1.00 | 0.0000 |

SUPPLEMENTARY DATA

Supplementary Table 6: Results from enrichment in TargetScan microRNA 2017 database (178 unique genes from annotation to CpG identified in Model 1)

| Term            | Overlap | P-value   | Adjusted P-value | Old P-value | Old Adjusted P-value | Z-score | Combined Score | Genes                                                                                                                                   |
|-----------------|---------|-----------|------------------|-------------|----------------------|---------|----------------|-----------------------------------------------------------------------------------------------------------------------------------------|
| hsa-miR-1538    | 28/1027 | 1.194E-07 | 4.05E-05         | 1.236E-09   | 4.1885E-07           | -1.924  | 30.67          | 16;CTSD;GPC6;TBC1D22A;SLC39A3;NKX2-2;SRRM4;SLC12A5;RBFOX3;PRKCB;RASL10B;IRX4;MTUS2;KCNAB2;BAIAP2;C1ORF159;                              |
| hsa-miR-4745-3p | 28/1027 | 1.194E-07 | 4.05E-05         | 1.236E-09   | 4.1885E-07           | -1.917  | 30.56          | 16;CTSD;GPC6;TBC1D22A;SLC39A3;NKX2-2;SRRM4;SLC12A5;RBFOX3;PRKCB;RASL10B;IRX4;MTUS2;KCNAB2;BAIAP2;C1ORF159;                              |
| hsa-miR-3180    | 32/1475 | 2.206E-06 | 0.000299         | 1.538E-08   | 2.0856E-06           | -2.443  | 31.82          | ROH5;MCF2L;PRDM16;ZNF469;QSOX2;TBC1D22A;GALNT9;SLC39A3;NKX2-2;ANKS18;ENTPD2;SLC12A5;TPSG1;MTUS2;KCNAB2;BAIAP2;CBFA2T3;SEPT5;KCNQ1;H     |
| hsa-miR-3180-3p | 32/1475 | 2.206E-06 | 0.000299         | 1.538E-08   | 2.0856E-06           | -2.438  | 31.75          | ROH5;MCF2L;PRDM16;ZNF469;QSOX2;TBC1D22A;GALNT9;SLC39A3;NKX2-2;ANKS18;ENTPD2;SLC12A5;TPSG1;MTUS2;KCNAB2;BAIAP2;CBFA2T3;SEPT5;KCNQ1;H     |
| hsa-miR-3196    | 32/1475 | 2.206E-06 | 0.000299         | 1.538E-08   | 2.0856E-06           | -2.433  | 31.68          | ROH5;MCF2L;PRDM16;ZNF469;QSOX2;TBC1D22A;GALNT9;SLC39A3;NKX2-2;ANKS18;ENTPD2;SLC12A5;TPSG1;MTUS2;KCNAB2;BAIAP2;CBFA2T3;SEPT5;KCNQ1;H     |
| hsa-miR-3186-3p | 11/270  | 3.152E-05 | 0.003562         | 5.718E-06   | 0.00043072           | -1.241  | 12.86          | KCNT1;ATCAY;C1ORF159;CHRNA4;TMEM139;PRDM16;PLD6;BAIAP2;CBFA2T3;LPP;SLC39A3                                                              |
| hsa-miR-4707-5p | 24/1113 | 5.295E-05 | 0.004906         | 1.543E-06   | 0.00017431           | -1.926  | 18.96          | ABR;RXRA;KCNT1;JPH3;ATCAY;B3GNT6;MFNG;CDH22;PRDM16;PIEZO1;HCN2;GALNT9                                                                   |
| hsa-miR-1268    | 23/1055 | 6.513E-05 | 0.004906         | 2.207E-06   | 0.00018702           | -1.882  | 18.14          | SLC39A3                                                                                                                                 |
| hsa-miR-1268b   | 23/1055 | 6.513E-05 | 0.004906         | 2.207E-06   | 0.00018702           | -1.877  | 18.09          | IAP2;CBFA2T3;LPP;ATCAY;TRIM29;KCNQ1;EFCAB2;QSOX2;DLGAP2;HCN2;GALNT9;SLC39A3                                                             |
| hsa-miR-1250    | 15/528  | 7.953E-05 | 0.005392         | 8.034E-06   | 0.0004952            | -1.347  | 12.72          | RBFOX3;CHRNA4;MTUS2;GATA4;KCNAB2;ADARB2;CBFA2T3;SEPT5;MYLK4;C16ORF82;MPPED1;MCF2L;EFCAB2;ZNF469;HCN2                                    |
| hsa-miR-4462    | 19/814  | 0.0001229 | 0.006944         | 7.411E-06   | 0.0004952            | -1.614  | 14.54          | GRIA1;SLC12A5;PRKCB;CHRNA4;RASL10B;GBE1;FUT10;FLT4;CACNA1B;GATA4;ADARB2;JPH3;MPPED1;MROH5;MCF2L;TBC1D22A;PLXNA4;GALNT9;SLC39A3          |
| hsa-miR-3621    | 14/487  | 0.0001222 | 0.006944         | 1.446E-05   | 0.0007815            | -1.296  | 11.67          | TOR4A;RASL10B;ATP2B2;SEPT5;ATCAY;TRIM29;MCF2L;EFCAB2;KCNQ2;PRDM16;TPA1;TBC1D22A;PLXNA4;GALNT9                                           |
| hsa-miR-3676    | 16/629  | 0.0001649 | 0.007987         | 1.506E-05   | 0.0007815            | -1.450  | 12.63          | MEF2A;GRIA1;RYR2;MTUS2;GATA4;ADARB2;LPP;C1ORF159;PRDM16;GSE1;BU83;DLGAP2;GPC6;TBC1D22A;PLXNA4;GALNT9                                    |
| hsa-miR-191     | 15/561  | 0.000155  | 0.007987         | 1.614E-05   | 0.0007815            | -1.339  | 11.75          | TCF7L2;SLC12A5;CHRNA4;IRX4;ATP2B2;KCNAB2;CBFA2T3;LPP;SEPT5;GLIS1;AJAP1;ABR;RXRA;PRDM16;PLXNA4                                           |
| hsa-miR-4467    | 18/803  | 0.0003049 | 0.013781         | 2.244E-05   | 0.00101408           | -1.601  | 12.96          | MEF2A;FCN1;TOR4A;SLC12A5;IRX4;CELFA4;CHD5;MTUS2;C2CD4C;PLD6;ADARB2;GLIS1;RXRA;PIEZO1;DLGAP2;HCN2;GALNT9;NKX2-2                          |
| hsa-miR-3193    | 16/695  | 0.0004984 | 0.019826         | 4.896E-05   | 0.00176735           | -1.432  | 10.89          | TOR4A;CHRNA4;CACNA1B;CELFA4;C2CD4C;NPL;ADARB2;CBFA2T3;ABR;RXRA;KCNT1;JPH3;GSE1;DLGAP2;DSCAML1;TBC1D22A                                  |
| hsa-miR-339-3p  | 13/497  | 0.0005264 | 0.019826         | 7.614E-05   | 0.00222858           | -1.226  | 9.26           | ENTPD2;RBFOX3;IRX4;CHD5;C2CD4C;BAIAP2;LPP;CACNA1G;MYLK4;RXRA;PRDM16;ZNF469;HCN2                                                         |
| hsa-miR-574-3p  | 12/431  | 0.0004986 | 0.019826         | 8.217E-05   | 0.00222858           | -1.172  | 8.91           | WWTR1;RXRA;KCNT1;RASL10B;PRDM16;MTUS2;QSOX2;PLD6;CBFA2T3;SLC39A3;ANKS18;MYLK4                                                           |
| hsa-miR-3177-3p | 16/713  | 0.000656  | 0.023411         | 6.581E-05   | 0.00210085           | -1.459  | 10.69          | CHRNA4;CACNA1B;C2CD4C;KCNAB2;BAIAP2;GLIS1;CRHR1;CAPN14;C1ORF159;B3GNT6;PIPSKL1;MCF2L;TPAL;ALDH7A1;PLXNA4;SLC39A3                        |
| hsa-miR-3178    | 17/789  | 0.0007014 | 0.023776         | 6.263E-05   | 0.00210085           | -1.561  | 11.34          | TOR4A;SLC12A5;RBFOX3;RASL10B;FLT4;BAIAP2;CBFA2T3;LPP;MR2;ABR;RXRA;MCF2L;DLGAP2;TBC1D22A;PLXNA4;HCN2;GALNT9                              |
| hsa-miR-564     | 22/1188 | 0.0008977 | 0.0279           | 4.579E-05   | 0.00176735           | -1.966  | 13.79          | RA;ATCAY;C1ORF159;C1ORF159;B3GNT6;PIPSKL1;PRDM16;QSOX2;DLGAP2;PLXNA4;ANKS18                                                             |
| hsa-miR-1306    | 11/398  | 0.0009053 | 0.0279           | 0.0001748   | 0.00408772           | -1.199  | 8.40           | ATCAY;PRKCB;CHRNA4;MCF2L;PRDM16;MTUS2;DSCAML1;LPP;PLXNA4;SLC39A3;NKX2-2                                                                 |
| hsa-miR-615-3p  | 13/531  | 0.0009684 | 0.028547         | 0.0001449   | 0.00353192           | -1.273  | 8.83           | MEF2A;GRIA1;UNC5A;PRKCB;FLT4;CHD5;KCNAB2;PLD6;AJAP1;RXRA;C1ORF159;MICAL2;GSE1                                                           |
| hsa-miR-4707-3p | 21/1145 | 0.0013297 | 0.037069         | 7.995E-05   | 0.00222858           | -1.884  | 12.48          | TOR4A;RBFOX3;CHRNA4;FLT4;IRX4;C2CD4C;KCNAB2;BAIAP2;LPP;SEPT5;C1QTNF4;ATCAY;C1ORF159;TMEM139;MCF2L;KCNQ2;PRDM16;QSOX2;TPAL;TBC1D22A;HCN2 |
| hsa-miR-4665-3p | 10/356  | 0.0013669 | 0.037069         | 0.0003065   | 0.00593688           | -1.093  | 7.21           | ABR;SLC12A5;UNC5A;FLT4;KCNQ2;PRDM16;CELFA4;GSE1;DLGAP2;AJAP1                                                                            |
| hsa-miR-1908    | 29/1849 | 0.0018737 | 0.043806         | 4.953E-05   | 0.00176735           | -3.059  | 19.21          | PRDM16;DLGAP2;TBC1D22A;PLXNA4;SLC39A3;SRRM4;ENTPD2;SLC12A5;SLC6A18;RA5L10B;ATP2B2;KCNAB2;BAIAP2;CBFA2T3;SEPT5;B3GNT6;HCN2               |
| hsa-miR-663     | 29/1849 | 0.0018737 | 0.043806         | 4.953E-05   | 0.00176735           | -3.051  | 19.16          | PRDM16;DLGAP2;TBC1D22A;PLXNA4;SLC39A3;SRRM4;ENTPD2;SLC12A5;SLC6A18;RA5L10B;ATP2B2;KCNAB2;BAIAP2;CBFA2T3;SEPT5;B3GNT6;HCN2               |
| hsa-miR-3131    | 13/569  | 0.0017953 | 0.043806         | 0.0002797   | 0.00557854           | -1.195  | 7.56           | SLC12A5;CHD5;C2CD4C;ADARB2;PRLR;MYLK4;JPH3;C1ORF159;EFCAB2;DLGAP2;PLXNA4;SLC39A3;ANKS18                                                 |
| hsa-miR-611     | 13/569  | 0.0017953 | 0.043806         | 0.0002797   | 0.00557854           | -1.187  | 7.51           | SLC12A5;CHD5;C2CD4C;ADARB2;PRLR;MYLK4;JPH3;C1ORF159;EFCAB2;DLGAP2;PLXNA4;SLC39A3;ANKS18                                                 |
| mmu-miR-767     | 28/1784 | 0.0022365 | 0.049            | 6.817E-05   | 0.00210085           | -2.893  | 17.65          | ZNF469;GPC6;TBC1D22A;PLXNA4;MEF2A;PRKCB;RASL10B;MTUS2;ATP2B2;KCNAB2;BAIAP2;PRLR;CAPN14;DIAPH1;TPAL;XKR6                                 |
| hsa-miR-4638-5p | 21/1196 | 0.0022568 | 0.049            | 0.0001459   | 0.00353192           | -1.911  | 11.65          | SRRM4;RBFOX3;CHRNA4;FUT10;FLT4;CACNA1B;LPP;MYLK4;ATCAY;ALCAM;C1ORF159;MPPED1;B3GNT6;KCNQ2;GSE1;CTSD;DLGAP2;TBC1D22A;HCN2;GALNT9;SLC39A3 |
| hsa-miR-4738-5p | 17/887  | 0.0024572 | 0.049            | 0.0002486   | 0.00526688           | -1.544  | 9.28           | TOR4A;KCNAB2;ADARB2;LPP;CRHR1;RXRA;KCNT1;ATCAY;C1ORF159;MFNG;TMEM139;KCNQ2;PRDM16;DMRTB1;DLGAP2;WDFY4;GALNT9                            |
| hsa-miR-4431    | 10/383  | 0.0023355 | 0.049            | 0.0005356   | 0.00864691           | -1.040  | 6.30           | TOR4A;SRRM4;CDH22;PRDM16;GSE1;ADARB2;LPP;PLXNA4;NKX2-2;AJAP1                                                                            |
| hsa-miR-937     | 6/152   | 0.0024265 | 0.049            | 0.0009714   | 0.01197923           | -0.335  | 2.02           | SLC12A5;MCF2L;PRDM16;IRX4;C2CD4C;CBFA2T3                                                                                                |

SUPPLEMENTARY DATA

Supplementary Table 7: Results from enrichment in ENCODE Histone Modification 2015 database (178 unique genes from annotation to CpG identified in Model 1)

| Term                                             | Overlap | P-value | Adjusted P-value | Old P-value | Old Adjusted P-value | Z-score | Combined Score | Genes                                                                                                                                                                                                                                                                                                                                 |
|--------------------------------------------------|---------|---------|------------------|-------------|----------------------|---------|----------------|---------------------------------------------------------------------------------------------------------------------------------------------------------------------------------------------------------------------------------------------------------------------------------------------------------------------------------------|
| H3K27me3_ES-Bruce4_mm9                           | 48/2000 | 9.6E-11 | 3.9E-08          | 9.34E-20    | 3.81E-17             | -1.75   | 40.27          | PTPRU;RZR2;CHRNA4;ONECUT3;CACNA1B;CELF4;CHD5;GATA4;ADARB2;TRHDE;GLIS1;CRHR1;CACNA1G;C1QTNF4;MRC2;IGSF21;RXRA;JPH3;ALCAM;MROH5;CDH22;PRDM16;DMRTB1;PHACTR3;MICALL2;DLGAP2;PLXNA4;NKX2-2; ANKS1B;DIO3OS;SLC12A5;UNC5A;RBFOX3;PRKCB;RASL10B;CCDC109B;IRX4;ATP2B2;TACR1;BAIAP2;SEPT5;AJAP1;FAM101B;MPPED1;KCNQ1;KCNQ2;DSCAML1;HCN2        |
| H3K27me3_C2C12_mm9                               | 34/1269 | 6.5E-09 | 1.3E-06          | 3.02E-15    | 6.16E-13             | -1.75   | 33.09          | PTPRU;RZR2;CHRNA4;ONECUT3;FLT4;CELF4;DMKN;CRHR1;CACNA1G;C1QTNF4;IGSF21;JPH3;MROH5;MCF2L;CDH22;DMRTB1;BAI1;DLGAP2;PLXNA4;GALNT9;SLC12A5;UNC5A;RBFOX3;RASL10B;ATP2B2;MIR200B;TACR1;CBFA2T3;GFRA4;PSMB9;MPPED1;KCNQ1;KCNQ2;HCN2                                                                                                          |
| H3K27me3_myocyte_mm9                             | 28/1183 | 2E-06   | 0.00027          | 2.12E-11    | 1.44E-09             | -1.72   | 22.53          | PTPRU;RZR2;CHRNA4;ONECUT3;C2CD4C;DMKN;GLIS1;CRHR1;CACNA1G;C1QTNF4;KCNQ1;MUC2;JPH3;MROH5;MCF2L;CDH22;BAI1;DLGAP2;PLXNA4;GALNT9;NKX2-2;ENTPD2;RBFOX3;RASL10B;CBFA2T3;GFRA4;MPPED1;HCN2                                                                                                                                                  |
| H3K27me3_small intestine_mm9                     | 38/2000 | 5.1E-06 | 0.00052          | 2E-12       | 1.81E-10             | -1.61   | 19.67          | PTPRU;RZR2;CHRNA4;ONECUT3;CACNA1B;CHD5;GATA4;C2CD4C;NPL;TRHDE;CRHR1;C1QTNF4;IGSF21;KCNQ1;JPH3;MROH5;PRDM16;PHACTR3;BAI1;DLGAP2;PLXNA4;GALNT9;NKX2-2;ANKS1B;WWTR1;SLC12A5;UNC5A;RBFOX3;PRKCB;RASL10B; IRX4;ATP2B2;AJAP1;MPPED1;KCNQ2;ANKRD60;DSCAML1;HCN2                                                                              |
| H3K27me3_kidney epithelial cell_hg19             | 40/2217 | 9.5E-06 | 0.00077          | 2.22E-12    | 1.81E-10             | -1.65   | 19.08          | GRIA1;OCA2;RZR2;CHRNA4;CPNE4;AIRE;FLT4;CACNA1B;CHD5;GATA4;C2CD4C;NPL;ADARB2;CACNA1G;C1QTNF4;IGSF21;KCNQ1;JPH3;ATCAY;C10ORF71;MCF2L;PRDM16;PHACTR3;BAI1;PLXNA4;GALNT9;NKX2-2;ANKS1B;SRRM4;ENTPD2;SPHKAP;TPSG1; PRKCB;KCNIP4;IRX4;TACR1;GFRA4;AJAP1;C16ORF82;HAR1B                                                                      |
| H3K27me3_kidney_mm9                              | 32/1675 | 3E-05   | 0.00169          | 1.41E-10    | 7.19E-09             | -1.68   | 17.54          | PTPRU;RZR2;ONECUT3;SCHIP1;CACNA1B;CELF4;CHD5;GATA4;C2CD4C;TRHDE;CRHR1;CACNA1G;C1QTNF4;IGSF21;JPH3;CDH22;PRDM16;BAI1;DLGAP2;NKX2-2;DIO3OS;SRRM4;RBFOX3;PRKCB;CCDC109B;KCNIP4;MTUS2;GFRA4;KCNQ2;ANKRD60;DSCAML1;HCN2                                                                                                                    |
| H3K27me3_bronchial epithelial cell_hg19          | 37/2082 | 3.1E-05 | 0.00169          | 2.84E-11    | 1.66E-09             | -1.61   | 16.67          | GRIA1;OCA2;RZR2;CPNE4;ONECUT3;FLT4;CACNA1B;CELF4;CHD5;C2CD4C;ADARB2;TRHDE;CACNA1G;C1QTNF4;IGSF21;JPH3;ATCAY;C10ORF71;MCF2L;CDH22;PHACTR3;GPC6;PLXNA4;ANKS1B;SRRM4;SPHKAP;PRKCB;IRX4;ATP2B2;TACR1;PRLR;GFRA4;AJAP1;MPPED1;KCNQ2;GPR123;DSCAML1                                                                                         |
| H3K27me3_endothelial cell of umbilical vein_hg19 | 52/3393 | 3.3E-05 | 0.00169          | 1.98E-13    | 2.69E-11             | -1.53   | 15.76          | PTPRU;RZR2;ONECUT3;FLT4;CELF4;CHD5;DMKN;MYLK4;C1QTNF4;KCNQ1;JPH3;ATCAY;OR2AE1;MCF2L;PHACTR3;BAI1;GALNT9;ANKS1B;SRRM4;ENTPD2;UNC5A;PRKCB;AZGP1P1;TACR1;PRLR;OR1N2;GFRA4;MPPED1;KCNQ1;KCNQ2;GPR123;DSCAML1;GRIA1;OCA2;CHRNA4;AIRE;CACNA1B;C2CD4C;NPL;TRHDE;GLIS1;IGSF21;CDH22;PRDM16;GPC6;NKX2-2;RASL10B;KCNIP4;IRX4 ;ATP2B2;HCN2;HAR1B |
| H3K27me3_spleen_mm9                              | 34/2000 | 0.00016 | 0.00745          | 6.82E-10    | 3.09E-08             | -1.57   | 13.66          | PTPRU;CHRNA4;FUT10;GATA4;C2CD4C;NPL;PLD6;TRHDE;CRHR1;C1QTNF4;MRC2;IGSF21;KCNQ1;ATCAY;ALCAM;MROH5;CDH22;MICALL2;GALNT9;NKX2-2;ANKS1B;WWTR1;ENTPD2;RBFOX3;RASL10B;MTUS2;ATP2B2;SEPT5;KCNQ1;KCNQ2; ANKRD60;DSCAML1;HCN2;XKR6                                                                                                             |
| H3K27me3_BJ_hg19                                 | 34/2090 | 0.00037 | 0.01527          | 2.08E-09    | 8.47E-08             | -1.53   | 12.09          | OCA2;RZR2;CPNE4;FLT4;CELF4;CHD5;C2CD4C;CACNA1G;C1QTNF4;IGSF21;ABR;JPH3;ATCAY;MCF2L;CDH22;PRDM16;RPL38;PLXNA4;GALNT9;NKX2-2;ANKS1B;ENTPD2;UNC5A;PRKCB;KCNIP4;ATP2B2;TACR1;PRLR;GFRA4;AJAP1;MPPED1;KCNQ1;KCNQ2;GPR123                                                                                                                   |

SUPPLEMENTARY DATA

| Supplementary Table 8: Results from enrichment in GWAS Catalog 2019 database (178 unique genes from annotation to CpG identified in Model 1) |         |          |                  |             |                      |         |                |                            |
|----------------------------------------------------------------------------------------------------------------------------------------------|---------|----------|------------------|-------------|----------------------|---------|----------------|----------------------------|
| Term                                                                                                                                         | Overlap | P-value  | Adjusted P-value | Old P-value | Old Adjusted P-value | Z-score | Combined Score | Genes                      |
| DNA methylation (parent-of-origin)                                                                                                           | 3-8     | 3.76E-05 | 0.017            | 4.48E-05    | 0.020                | -4.55   | 46.41          | H19;MIR675;SEPT5           |
| End-stage renal disease                                                                                                                      | 2-7     | 0.001606 | 0.207            | 0.001515    | 0.119                | -3.41   | 21.91          | MBNL1;DLGAP2               |
| Aging (time to event)                                                                                                                        | 2-8     | 0.002129 | 0.207            | 0.001886    | 0.119                | -3.42   | 21.01          | GRIA1;ATCAY                |
| Disc degeneration (lumbar)                                                                                                                   | 2-9     | 0.002721 | 0.207            | 0.002295    | 0.119                | -2.81   | 16.62          | GPC6;PSMB9                 |
| Asparaginase hypersensitivity in acute lymphoblastic leukemia                                                                                | 2-9     | 0.002721 | 0.207            | 0.002295    | 0.119                | -2.61   | 15.40          | GRIA1;CACNA1B              |
| Hair color                                                                                                                                   | 4-61    | 0.002132 | 0.207            | 0.000905    | 0.119                | -1.30   | 7.99           | OCA2;PIEZO1;ZNF469;CBFA2T3 |
| Fasting blood insulin                                                                                                                        | 2-11    | 0.004109 | 0.219            | 0.003227    | 0.130                | -2.39   | 13.12          | TCF7L2;CNTN6               |
| Joint mobility (Beighton score)                                                                                                              | 3-35    | 0.00368  | 0.219            | 0.002013    | 0.119                | -1.72   | 9.62           | PIEZO1;CRHR1;XKR6          |
| Hemoglobin A1c levels                                                                                                                        | 3-37    | 0.004312 | 0.219            | 0.002335    | 0.119                | -1.58   | 8.62           | TCF7L2;KCNQ1;PIEZO1        |
| Cutaneous squamous cell carcinoma                                                                                                            | 2-14    | 0.006681 | 0.253            | 0.004901    | 0.132                | -2.66   | 13.33          | OCA2;LPP                   |
|                                                                                                                                              |         |          |                  |             |                      |         |                |                            |

SUPPLEMENTARY DATA

| Supplementary Table 9: Results from enrichment in dbGAP (accessed 08/2019) database (178 unique genes from annotation to CpG identified in Model 1) |         |          |                  |             |                      |         |                |                                                                                       |
|-----------------------------------------------------------------------------------------------------------------------------------------------------|---------|----------|------------------|-------------|----------------------|---------|----------------|---------------------------------------------------------------------------------------|
| Term                                                                                                                                                | Overlap | P-value  | Adjusted P-value | Old P-value | Old Adjusted P-value | Z-score | Combined Score | Genes                                                                                 |
| Body Height                                                                                                                                         | 14/385  | 9.49E-06 | 0.001            | 0.0002      | 0.02702              | -2.36   | 27.29          | GRIA1;RZR2;PRKCB;CACNA1B;TRHDE;IGSF21;ATIC;BPIFA3;WDR60;CDH22;BAI1;QSOX2;ANKRD60;XKR6 |
| Body Mass Index                                                                                                                                     | 13/437  | 0.000153 | 0.008            | 0.0026      | 0.11918              | -2.45   | 21.52          | RZR2;MBNL1;RBFOX3;CPNE4;FUT10;USP34;KCNIP4;ADARB2;LPP;GLIS1;KCNT1;WDFY4;ANKS1B        |
| Triglycerides                                                                                                                                       | 9/244   | 0.000348 | 0.013            | 0.0033      | 0.11918              | -2.29   | 18.22          | RBFOX3;CPNE4;AIRE;GBE1;KCNIP4;DLGAP2;DSCAML1;LPP;XKR6                                 |
| Blood Pressure                                                                                                                                      | 12/454  | 0.000786 | 0.022            | 0.0095      | 0.14918              | -2.30   | 16.44          | RZR2;MPPED1;BPIFA3;CNTN6;KCNIP4;PHACTR3;MTUS2;ATP2B2;DSCAML1;GPC6;PRLR;PLXNA4         |
| Electrocardiography                                                                                                                                 | 5/87    | 0.001082 | 0.024            | 0.005       | 0.13639              | -1.96   | 13.37          | RZR2;CPNE4;KCNQ1;ANKS1B;HLA-DPB2                                                      |
| Arthritis, Rheumatoid                                                                                                                               | 4/59    | 0.001885 | 0.035            | 0.0069      | 0.14918              | -1.80   | 11.28          | PRKCB;AIRE;PHACTR3;TRHDE                                                              |
| Blood Pressure Determination                                                                                                                        | 4/64    | 0.002543 | 0.040            | 0.009       | 0.14918              | -1.88   | 11.24          | TCF7L2;KCNIP4;ADARB2;PLXNA4                                                           |
| Echocardiography                                                                                                                                    | 8/273   | 0.003158 | 0.040            | 0.0197      | 0.19685              | -1.97   | 11.36          | CNTN6;CPNE4;SCHIP1;KCNIP4;ADARB2;GPC6;PLXNA4;GLIS1                                    |
| Body Weight                                                                                                                                         | 7/216   | 0.003272 | 0.040            | 0.0178      | 0.19616              | -1.97   | 11.25          | RBFOX3;BPIFA3;CPNE4;WDR60;FUT10;USP34;LPP                                             |
| Elbow                                                                                                                                               | 4/72    | 0.003898 | 0.043            | 0.0133      | 0.18237              | -1.68   | 9.30           | CCDC109B;PRDM16;KCNIP4;ADARB2                                                         |
|                                                                                                                                                     |         |          |                  |             |                      |         |                |                                                                                       |

SUPPLEMENTARY DATA

Supplementary Table 10: Results from enrichment in BioCarta 2016 database (178 unique genes from annotation to CpG identified in Model 1)

| Term                                                                                                             | Overlap | P-value | Adjusted P-value | Old P-value | Old Adjusted P-value | Z-score | Combined Score | Genes           |
|------------------------------------------------------------------------------------------------------------------|---------|---------|------------------|-------------|----------------------|---------|----------------|-----------------|
| Role of PPAR-gamma Coactivators in Obesity and Thermogenesis_Homo sapiens_h_ppargPathway                         | 2/9     | 0.003   | 0.158            | 0.004       | 0.256                | -1.58   | 9.33           | MED1;RXRA       |
| Mechanism of Gene Regulation by Peroxisome Proliferators via PPARa_Homo sapiens_h_pparaPathway                   | 3/52    | 0.011   | 0.285            | 0.013       | 0.314                | -1.49   | 6.70           | MED1;RXRA;PRKCB |
| Control of Gene Expression by Vitamin D Receptor_Homo sapiens_h_vdrPathway                                       | 2/27    | 0.024   | 0.285            | 0.030       | 0.314                | -1.39   | 5.20           | MED1;RXRA       |
| VEGF, Hypoxia, and Angiogenesis_Homo sapiens_h_vegfPathway                                                       | 2/30    | 0.029   | 0.285            | 0.036       | 0.314                | -1.55   | 5.48           | PRKCB;FLT4      |
| Phospholipids as signalling intermediaries_Homo sapiens_h_edg1Pathway                                            | 2/33    | 0.035   | 0.285            | 0.042       | 0.314                | -1.56   | 5.23           | SPHKAP;PRKCB    |
| Angiotensin II mediated activation of JNK Pathway via Pyk2 dependent signaling_Homo sapiens_h_At1rPathway        | 2/34    | 0.037   | 0.285            | 0.044       | 0.314                | -1.69   | 5.58           | MEF2A;PRKCB     |
| Basic mechanism of action of PPARa, PPARb(d) and PPARg and effects on gene expression_Homo sapiens_h_pparPathway | 1/5     | 0.044   | 0.285            | 0.056       | 0.314                | 1.76    | -5.52          | RXRA            |
| Actions of Nitric Oxide in the Heart_Homo sapiens_h_no1Pathway                                                   | 2/42    | 0.054   | 0.285            | 0.064       | 0.314                | -1.14   | 3.33           | RYR2;FLT4       |
| Signal Dependent Regulation of Myogenesis by Corepressor MITR_Homo sapiens_h_MITRPathway                         | 1/8     | 0.069   | 0.285            | 0.083       | 0.314                | 0.71    | -1.89          | MEF2A           |
| CBL mediated ligand-induced downregulation of EGF receptors_Homo sapiens_h_cblPathway                            | 1/8     | 0.069   | 0.285            | 0.083       | 0.314                | 0.77    | -2.07          | PRKCB           |
|                                                                                                                  |         |         |                  |             |                      |         |                |                 |

SUPPLEMENTARY DATA

| Supplementary Table 11: Results from enrichment in WikiPathways 2019 database (178 unique genes from annotation to CpG identified in Model 1) |         |         |                  |             |                      |         |                |                                   |
|-----------------------------------------------------------------------------------------------------------------------------------------------|---------|---------|------------------|-------------|----------------------|---------|----------------|-----------------------------------|
| Term                                                                                                                                          | Overlap | P-value | Adjusted P-value | Old P-value | Old Adjusted P-value | Z-score | Combined Score | Genes                             |
| Adipogenesis WP236                                                                                                                            | 6/130   | 0.001   | 0.150            | 0.001       | 0.172                | -1.08   | 7.37           | MEF2A;WWTR1;MBNL1;RXRA;GATA4;PRLR |
| Genes targeted by miRNAs in adipocytes WP1992                                                                                                 | 2/13    | 0.006   | 0.263            | 0.008       | 0.338                | -2.98   | 15.39          | KCNQ1;HCN2                        |
| Serotonin and anxiety-related events WP3944                                                                                                   | 2/13    | 0.006   | 0.263            | 0.008       | 0.338                | -2.91   | 15.00          | PRKCB;CRHR1                       |
| Energy Metabolism WP1541                                                                                                                      | 3/47    | 0.008   | 0.289            | 0.010       | 0.338                | -2.11   | 10.10          | MEF2A;MED1;RXRA                   |
| Pathways Regulating Hippo Signaling WP4540                                                                                                    | 4/98    | 0.011   | 0.311            | 0.013       | 0.338                | -1.22   | 5.47           | TCF7L2;PRKCB;FLT4;CDH22           |
| Sudden Infant Death Syndrome (SIDS) Susceptibility Pathways WP706                                                                             | 5/158   | 0.014   | 0.311            | 0.015       | 0.338                | -1.03   | 4.44           | RYR2;CHRNA4;KCNQ1;TACR1;NKX2-2    |
| Physiological and Pathological Hypertrophy of the Heart WP1528                                                                                | 2/25    | 0.021   | 0.404            | 0.024       | 0.468                | -2.10   | 8.14           | PRKCB;GATA4                       |
| miRs in Muscle Cell Differentiation WP2012                                                                                                    | 2/29    | 0.027   | 0.416            | 0.031       | 0.472                | -2.48   | 8.92           | MEF2A;PRKCB                       |
| Non-genomic actions of 1,25 dihydroxyvitamin D3 WP4341                                                                                        | 3/71    | 0.025   | 0.416            | 0.028       | 0.472                | -1.09   | 4.02           | MED1;RXRA;PRKCB                   |
| Cerebral Organic Acidurias, including diseases WP4519                                                                                         | 1/7     | 0.061   | 0.513            | 0.069       | 0.529                | -3.50   | 9.81           | ALDH7A1                           |
|                                                                                                                                               |         |         |                  |             |                      |         |                |                                   |
